# Supplementary material for: DNA methylation abnormalities of imprinted genes in congenital heart disease: a pilot study
Source: PubMed Central journal article supplement (PMC7789576; doi:10.1186/s12920-020-00848-0), 2021-01-06
Supplement: 12920_2020_848_MOESM13_ESM.pdf [file 12920_2020_848_MOESM13_ESM.pdf]

Table S4 CpG sites methylation level of GRB10 in CHD patients and healthy individuals

| Groups  | SampleID | CpG_1.2 | CpG_3 | CpG_4 |
|---------|----------|---------|-------|-------|
|         | 1        | 0.38    | 0.46  | 0.4   |
|         | 2        | 0.35    | 0.44  | 0.39  |
|         | 3        | 0.4     | 0.48  | 0.45  |
|         | 4        | 0.4     | 0.46  | 0.45  |
|         | 5        | 0.39    | 0.44  | 0.41  |
|         | 6        | 0.39    | 0.46  | 0.43  |
|         | 7        |         |       |       |
|         | 8        | 0.4     | 0.45  | 0.43  |
|         | 9        |         |       |       |
|         | 10       | 0.41    | 0.47  | 0.44  |
|         | 11       | 0.43    | 0.42  | 0.46  |
|         | 12       | 0.37    | 0.42  | 0.4   |
|         | 13       | 0.37    | 0.44  | 0.41  |
| Control | 14       | 0.36    | 0.41  | 0.42  |
|         | 15       | 0.34    | 0.44  | 0.42  |
|         | 16       | 0.36    | 0.43  | 0.44  |
|         | 17       | 0.37    | 0.43  | 0.35  |
|         | 18       | 0.45    | 0.5   | 0.49  |
|         | 19       | 0.35    | 0.44  | 0.37  |
|         | 20       |         |       |       |
|         | 21       | 0.39    | 0.39  | 0.35  |
|         | 22       | 0.38    | 0.43  | 0.46  |
|         | 23       | 0.37    | 0.42  | 0.42  |
|         | 24       |         |       |       |
|         | 25       | 0.49    | 0.49  | 0.52  |
|         | 26       | 0.4     | 0.45  | 0.49  |
|         | 27       | 0.75    | 0.78  | 0.71  |
|         | 28       |         |       |       |
|         | 1        | 0.58    | 0.66  | 0.6   |
|         | 2        | 0.43    | 0.52  | 0.4   |
|         | 3        | 0.49    | 0.65  | 0.58  |
|         | 4        | 0.43    | 0.48  | 0.4   |
|         | 5        | 0.44    | 0.49  | 0.38  |
|         | 6        | 0.47    | 0.54  | 0.43  |
|         | 7        | 0.49    | 0.49  | 0.48  |
|         | 8        | 0.5     | 0.51  | 0.47  |
|         | 9        |         |       |       |
|         | 10       | 0.6     | 0.59  | 0.57  |
|         | 11       | 0.5     | 0.56  | 0.49  |
|         | 12       | 0.43    | 0.51  | 0.47  |
|         | 13       | 0.42    | 0.49  | 0.43  |
| CHD     | 14       | 0.69    | 0.7   | 0.67  |
|         | 15       | 0.44    | 0.54  | 0.54  |
|         | 16       | 0.54    | 0.59  | 0.56  |
|         | 17       | 0.45    | 0.52  | 0.48  |

|    |      |      |      |
|----|------|------|------|
| 18 | 0.41 | 0.48 | 0.42 |
| 19 |      |      |      |
| 20 | 0.53 | 0.56 | 0.61 |
| 21 | 0.46 | 0.55 | 0.4  |
| 22 | 0.5  | 0.64 | 0.55 |
| 23 | 0.44 | 0.55 | 0.52 |
| 24 | 0.48 | 0.55 | 0.4  |
| 25 | 0.36 | 0.43 | 0.34 |
| 26 | 0.63 | 0.64 | 0.62 |
| 27 | 0.59 | 0.55 | 0.44 |

---
