# Supplementary material for: DNA methylation abnormalities of imprinted genes in congenital heart disease: a pilot study
Source: PubMed Central journal article supplement (PMC7789576; doi:10.1186/s12920-020-00848-0), 2021-01-06
Supplement: 12920_2020_848_MOESM14_ESM.pdf [file 12920_2020_848_MOESM14_ESM.pdf]

Table S5.1 CpG sites methylation level of INPP5F in CHD patients and healthy individuals

| Groups  | SampleID | CpG_1 | CpG_2.3 | CpG_4.5 | CpG_6 | CpG_7.8 | CpG_9 | CpG_10.1 |
|---------|----------|-------|---------|---------|-------|---------|-------|----------|
|         | 1        |       |         |         |       |         |       |          |
|         | 2        |       |         |         |       |         |       |          |
|         | 3        | 0.81  | 0.89    | 0.78    | 0.25  | 0.51    | 0.62  | 0.55     |
|         | 4        | 0.83  | 0.91    | 0.79    | 0.28  | 0.52    | 0.6   | 0.61     |
|         | 5        | 0.76  | 0.83    | 0.71    | 0.21  | 0.52    | 0.58  | 0.55     |
|         | 6        | 0.8   | 0.91    | 0.81    | 0.24  | 0.45    | 0.57  | 0.55     |
|         | 7        | 0.84  | 0.94    | 0.86    | 0.25  | 0.51    | 0.57  | 0.54     |
|         | 8        | 0.67  | 0.76    | 0.69    | 0.26  | 0.42    | 0.55  | 0.61     |
|         | 9        | 0.75  | 0.9     | 0.79    | 0.19  | 0.53    | 0.63  | 0.51     |
|         | 10       |       |         |         |       |         |       |          |
|         | 11       | 0.73  | 0.85    | 0.69    | 0.24  | 0.51    | 0.59  | 0.53     |
|         | 12       | 0.84  | 0.9     | 0.82    | 0.27  | 0.51    | 0.61  | 0.59     |
|         | 13       |       |         |         |       |         |       |          |
| Control | 14       | 0.81  | 0.88    | 0.78    | 0.18  | 0.49    | 0.61  | 0.52     |
|         | 15       | 0.81  | 0.86    | 0.75    | 0.32  | 0.54    | 0.61  | 0.6      |
|         | 16       | 0.82  | 0.9     | 0.77    | 0.21  | 0.52    | 0.58  | 0.52     |
|         | 17       |       |         |         |       |         |       |          |
|         | 18       |       |         |         |       |         |       |          |
|         | 19       | 0.89  | 0.88    | 0.8     | 0.16  | 0.58    | 0.7   | 0.43     |
|         | 20       |       |         |         |       |         |       |          |
|         | 21       |       |         |         |       |         |       |          |
|         | 22       | 0.83  | 0.89    | 0.82    | 0.26  | 0.5     | 0.59  | 0.61     |
|         | 23       | 0.85  | 0.89    | 0.84    | 0.28  | 0.55    | 0.61  | 0.61     |
|         | 24       | 0.85  | 0.92    | 0.84    | 0.26  | 0.54    | 0.6   | 0.58     |
|         | 25       |       |         |         |       |         |       |          |
|         | 26       |       |         |         |       |         |       |          |
|         | 27       |       |         |         |       |         |       |          |
|         | 28       | 0.82  | 0.89    | 0.81    | 0.26  | 0.54    | 0.62  | 0.51     |
|         | 1        |       |         |         |       |         |       |          |
|         | 2        |       |         |         |       |         |       |          |
|         | 3        | 0.8   | 0.87    | 0.85    | 0.2   | 0.45    | 0.55  | 0.5      |
|         | 4        | 0.71  | 0.85    | 0.74    | 0.22  | 0.4     | 0.45  | 0.67     |
|         | 5        | 0.73  | 0.9     | 0.78    | 0.11  | 0.35    | 0.44  | 0.4      |
|         | 6        | 0.74  | 0.87    | 0.81    | 0.17  | 0.38    | 0.44  | 0.51     |
|         | 7        | 0.75  | 0.87    | 0.79    | 0.18  | 0.42    | 0.48  | 0.54     |
|         | 8        | 0.76  | 0.94    | 0.85    | 0.3   | 0.51    | 0.62  | 0.64     |
|         | 9        | 0.94  | 0.88    | 0.83    | 0.26  | 0.46    | 0.6   | 0.58     |
|         | 10       | 0.69  | 0.84    | 0.73    | 0.21  | 0.44    | 0.52  | 0.5      |
|         | 11       | 0.77  | 0.87    | 0.86    | 0.24  | 0.52    | 0.62  | 0.54     |
|         | 12       | 0.7   | 0.8     | 0.7     | 0.25  | 0.42    | 0.49  | 0.57     |
|         | 13       | 0.57  | 0.71    | 0.57    | 0.17  | 0.38    | 0.47  | 0.38     |
| CHD     | 14       | 0.68  | 0.84    | 0.74    | 0.18  | 0.35    | 0.44  | 0.48     |
|         | 15       |       |         |         |       |         |       |          |
|         | 16       | 0.6   | 0.79    | 0.69    | 0.26  | 0.4     | 0.48  | 0.59     |

|    |      |      |      |      |      |      |      |
|----|------|------|------|------|------|------|------|
| 17 | 0.72 | 0.86 | 0.71 | 0.2  | 0.35 | 0.49 | 0.45 |
| 18 | 0.69 | 0.82 | 0.74 | 0.2  | 0.4  | 0.48 | 0.51 |
| 19 |      |      |      |      |      |      |      |
| 20 | 0.88 | 0.96 | 0.95 | 0.13 | 0.46 | 0.56 | 0.38 |
| 21 | 0.77 | 0.92 | 0.78 | 0.24 | 0.47 | 0.48 | 0.55 |
| 22 |      |      |      |      |      |      |      |
| 23 | 0.89 | 0.86 | 0.71 | 0.24 | 0.45 | 0.5  | 0.54 |
| 24 | 0.8  | 0.92 | 0.82 | 0.24 | 0.45 | 0.51 | 0.54 |
| 25 | 0.63 | 0.79 | 0.64 | 0.21 | 0.47 | 0.56 | 0.5  |
| 26 | 0.64 | 0.74 | 0.7  | 0.23 | 0.43 | 0.46 | 0.48 |
| 27 | 0.71 | 0.84 | 0.71 | 0.17 | 0.41 | 0.55 | 0.42 |

---

Table S5.2 CpG sites methylation level of INPP5F in CHD patients and healthy individuals

| Groups  | SampleID | CpG_12 | CpG_13 | CpG_14 | CpG_15.1 | CpG_17 | CpG_18.1 | CpG_20.2 |
|---------|----------|--------|--------|--------|----------|--------|----------|----------|
|         | 1        |        |        |        |          |        |          |          |
|         | 2        |        |        |        |          |        |          |          |
|         | 3        | 0.56   | 0.54   | 0.57   | 0.86     | 0.91   | 0.93     | 0.93     |
|         | 4        | 0.57   | 0.57   | 0.58   | 0.88     | 0.85   | 0.96     | 0.94     |
|         | 5        | 0.54   | 0.53   | 0.57   | 1        | 0.87   | 0.71     | 0.99     |
|         | 6        | 0.52   | 0.51   | 0.54   | 0.82     | 0.83   | 0.88     | 0.85     |
|         | 7        | 0.56   | 0.52   | 0.55   | 0.89     | 0.87   | 0.91     | 0.91     |
|         | 8        | 0.55   | 0.56   | 0.5    | 0.74     | 0.76   | 0.87     | 0.9      |
|         | 9        | 0.56   | 0.56   | 0.59   | 0.81     | 0.76   | 0.76     | 0.74     |
|         | 10       |        |        |        |          |        |          |          |
|         | 11       | 0.55   | 0.52   | 0.55   | 0.88     | 0.86   | 0.91     | 0.89     |
|         | 12       | 0.59   | 0.56   | 0.56   | 0.51     | 0.46   | 0.38     | 0.47     |
|         | 13       |        |        |        |          |        |          |          |
| Control | 14       | 0.59   | 0.59   | 0.58   | 0.83     | 0.88   | 0.94     | 0.84     |
|         | 15       | 0.53   | 0.54   | 0.57   | 0.6      | 0.64   | 0.69     | 0.7      |
|         | 16       | 0.53   | 0.53   | 0.55   | 0.8      | 0.81   | 0.77     | 0.8      |
|         | 17       |        |        |        |          |        |          |          |
|         | 18       |        |        |        |          |        |          |          |
|         | 19       | 0.61   | 0.61   | 0.64   | 0.71     | 0.75   | 0.97     | 0.84     |
|         | 20       |        |        |        |          |        |          |          |
|         | 21       |        |        |        |          |        |          |          |
|         | 22       | 0.57   | 0.55   | 0.53   | 0.85     | 0.92   | 0.92     | 0.9      |
|         | 23       | 0.59   | 0.61   | 0.57   | 0.89     | 0.9    | 0.93     | 0.91     |
|         | 24       | 0.59   | 0.56   | 0.59   | 0.91     | 0.95   | 0.9      | 0.91     |
|         | 25       |        |        |        |          |        |          |          |
|         | 26       |        |        |        |          |        |          |          |
|         | 27       |        |        |        |          |        |          |          |
|         | 28       | 0.59   | 0.49   | 0.58   | 0.92     | 0.93   | 0.92     | 0.93     |
|         | 1        |        |        |        |          |        |          |          |
|         | 2        |        |        |        |          |        |          |          |
|         | 3        | 0.5    | 0.46   | 0.52   | 0.89     | 0.88   | 0.93     | 0.92     |
|         | 4        | 0.42   | 0.43   | 0.37   | 0.84     | 0.85   | 0.87     | 0.89     |
|         | 5        | 0.37   | 0.3    | 0.48   | 0.87     | 0.87   | 0.93     | 0.89     |
|         | 6        | 0.46   | 0.45   | 0.45   | 0.77     | 0.79   | 0.87     | 0.82     |
|         | 7        | 0.43   | 0.42   | 0.48   | 0.8      | 0.81   | 0.89     | 0.88     |
|         | 8        | 0.55   | 0.58   | 0.56   | 0.88     | 0.87   | 0.97     | 0.9      |
|         | 9        | 0.54   | 0.53   | 0.5    | 0.89     | 0.83   | 0.88     | 0.88     |
|         | 10       | 0.46   | 0.46   | 0.47   | 0.88     | 0.88   | 0.94     | 0.89     |
|         | 11       | 0.56   | 0.51   | 0.58   | 0.83     | 0.87   | 0.88     | 0.9      |
|         | 12       | 0.49   | 0.44   | 0.45   | 0.83     | 0.81   | 0.93     | 0.86     |
|         | 13       | 0.42   | 0.42   | 0.41   | 0.78     | 0.77   | 0.82     | 0.83     |
| CHD     | 14       | 0.39   | 0.45   | 0.45   | 0.84     | 0.85   | 0.89     | 0.87     |
|         | 15       |        |        |        |          |        |          |          |
|         | 16       | 0.46   | 0.44   | 0.44   | 0.74     | 0.72   | 0.81     | 0.79     |

|    |      |      |      |      |      |      |      |
|----|------|------|------|------|------|------|------|
| 17 | 0.41 | 0.35 | 0.43 | 0.75 | 0.81 | 0.79 | 0.84 |
| 18 | 0.45 | 0.43 | 0.47 | 0.69 | 0.7  | 0.76 | 0.76 |
| 19 |      |      |      |      |      |      |      |
| 20 | 0.5  | 0.4  | 0.49 | 0.85 | 0.88 | 0.86 | 0.85 |
| 21 | 0.43 | 0.46 | 0.48 | 0.65 | 0.73 | 0.71 | 0.74 |
| 22 |      |      |      |      |      |      |      |
| 23 | 0.49 | 0.45 | 0.51 | 0.78 | 0.8  | 0.92 | 0.9  |
| 24 | 0.52 | 0.5  | 0.45 | 0.85 | 0.87 | 0.89 | 0.88 |
| 25 | 0.45 | 0.47 | 0.48 | 0.93 | 0.9  | 0.98 | 0.9  |
| 26 | 0.44 | 0.33 | 0.45 | 0.76 | 0.8  | 0.79 | 0.76 |
| 27 | 0.45 | 0.39 | 0.47 | 0.9  | 0.91 | 0.93 | 0.92 |

---

Table S5.3 CpG sites methylation level of INPP5F in CHD patients and healthy individuals

| Groups  | SampleID | CpG_22 | CpG_23 | CpG_24 | CpG_25.26 | CpG_27.28 | CpG_29.30 | CpG_31 |
|---------|----------|--------|--------|--------|-----------|-----------|-----------|--------|
|         | 1        |        |        |        |           |           |           |        |
|         | 2        |        |        |        |           |           |           |        |
|         | 3        | 1      | 0.91   | NA     | 0.5       | 0.77      | 0.79      | 0.77   |
|         | 4        | 1      | 0.86   | 0.68   | 0.76      | 0.8       | 0.83      | 0.78   |
|         | 5        | 1      | 0.84   | 0.54   | 0.76      | 0.67      | 0.82      | 0.73   |
|         | 6        | 1      | 0.8    | 0.51   | 0.8       | 0.7       | 0.75      | 0.75   |
|         | 7        | 1      | 0.87   | 0.72   | 0.76      | 0.77      | 0.87      | 0.79   |
|         | 8        | 1      | 0.77   | 0.75   | 0.65      | 0.67      | 0.7       | 0.65   |
|         | 9        | 0.92   | 0.79   | NA     | 0.78      | 0.7       | 0.76      | 0.7    |
|         | 10       |        |        |        |           |           |           |        |
|         | 11       | 1      | 0.86   | NA     | 0.07      | 0.77      | 0.8       | 0.78   |
|         | 12       | 0.58   | 0.87   | 0.7    | 0.78      | 0.8       | 0.81      | 0.8    |
|         | 13       |        |        |        |           |           |           |        |
| Control | 14       | 1      | 0.87   | NA     | NA        | 0.83      | 0.85      | 0.78   |
|         | 15       | 0.8    | 0.88   | 0.57   | 0.86      | 0.76      | 0.91      | 0.72   |
|         | 16       | 1      | 0.85   | 0.54   | 0.84      | 0.74      | 0.86      | 0.75   |
|         | 17       |        |        |        |           |           |           |        |
|         | 18       |        |        |        |           |           |           |        |
|         | 19       | 1      | 0.91   | 0.64   | 0.85      | 0.84      | 0.87      | 0.84   |
|         | 20       |        |        |        |           |           |           |        |
|         | 21       |        |        |        |           |           |           |        |
|         | 22       | 1      | 0.89   | 0.64   | 0.87      | 0.82      | 0.87      | 0.81   |
|         | 23       | 1      | 0.86   | 0.58   | 0.8       | 0.78      | 0.83      | 0.75   |
|         | 24       | 1      | 0.84   | 0.61   | 0.82      | 0.78      | 0.81      | 0.78   |
|         | 25       |        |        |        |           |           |           |        |
|         | 26       |        |        |        |           |           |           |        |
|         | 27       |        |        |        |           |           |           |        |
|         | 28       | 0.97   | 0.88   | 0.62   | 0.92      | 0.86      | 0.89      | 0.82   |
|         | 1        |        |        |        |           |           |           |        |
|         | 2        |        |        |        |           |           |           |        |
|         | 3        | 1      | 0.79   | 0.57   | 0.75      | 0.71      | 0.79      | 0.73   |
|         | 4        | 1      | 0.69   | 0.46   | 0.72      | 0.6       | 0.72      | 0.61   |
|         | 5        | 1      | 0.71   | 0.53   | 0.74      | 0.62      | 0.72      | 0.62   |
|         | 6        | 0.92   | 0.66   | 0.46   | 0.67      | 0.58      | 0.61      | 0.56   |
|         | 7        | 1      | 0.72   | 0.5    | 0.67      | 0.58      | 0.68      | 0.63   |
|         | 8        | 1      | 0.8    | 0.54   | 0.73      | 0.67      | 0.79      | 0.68   |
|         | 9        | 1      | 0.88   | 0.63   | 0.81      | 0.78      | 0.87      | 0.8    |
|         | 10       | 0.95   | 0.74   | 0.52   | 0.74      | 0.63      | 0.69      | 0.68   |
|         | 11       | 1      | 0.82   | 0.67   | 0.77      | 0.73      | 0.81      | 0.72   |
|         | 12       | 1      | 0.76   | 0.48   | 0.69      | 0.65      | 0.77      | 0.6    |
|         | 13       | 0.97   | 0.64   | 0.46   | 0.65      | 0.55      | 0.66      | 0.58   |
| CHD     | 14       | 1      | 0.72   | 0.52   | 0.7       | 0.63      | 0.77      | 0.63   |
|         | 15       |        |        |        |           |           |           |        |
|         | 16       | 0.92   | 0.6    | 0.44   | 0.6       | 0.53      | 0.68      | 0.51   |

|    |      |      |      |      |      |      |      |
|----|------|------|------|------|------|------|------|
| 17 | 0.93 | 0.83 | 0.48 | 0.7  | 0.68 | 0.81 | 0.69 |
| 18 | 0.91 | 0.62 | 0.44 | 0.66 | 0.54 | 0.63 | 0.55 |
| 19 |      |      |      |      |      |      |      |
| 20 | 1    | 0.77 | 0.51 | 0.71 | 0.66 | 0.79 | 0.69 |
| 21 | 0.85 | 0.64 | 0.59 | 0.67 | 0.58 | 0.75 | 0.62 |
| 22 |      |      |      |      |      |      |      |
| 23 | 1    | 0.79 | 0.62 | 0.78 | 0.73 | 0.79 | 0.74 |
| 24 | 0.98 | 0.78 | 0.57 | 0.69 | 0.67 | 0.8  | 0.68 |
| 25 | 1    | 0.74 | 0.57 | 0.69 | 0.69 | 0.75 | 0.61 |
| 26 | 0.96 | 0.65 | 0.46 | 0.63 | 0.56 | 0.62 | 0.47 |
| 27 | 1    | 0.82 | 0.58 | 0.78 | 0.75 | 0.79 | 0.74 |

---

Table S5.4 CpG sites methylation level of INPP5F in CHD patients and healthy individuals

| Groups  | SampleID | CpG_32 | CpG_33 |
|---------|----------|--------|--------|
|         | 1        |        |        |
|         | 2        |        |        |
|         | 3        | 0.89   | 0.99   |
|         | 4        | 0.89   | 1      |
|         | 5        | 0.98   | 0.97   |
|         | 6        | 0.86   | 0.98   |
|         | 7        | 0.92   | 0.98   |
|         | 8        | 0.81   | 0.97   |
|         | 9        | 0.86   | 0.96   |
|         | 10       |        |        |
|         | 11       | 0.85   | 1      |
|         | 12       | 0.84   | 0.98   |
|         | 13       |        |        |
| Control | 14       | 0.92   | 0.97   |
|         | 15       | 0.94   | 0.99   |
|         | 16       | 0.88   | 0.99   |
|         | 17       |        |        |
|         | 18       |        |        |
|         | 19       | 0.9    | 1      |
|         | 20       |        |        |
|         | 21       |        |        |
|         | 22       | 0.92   | 0.96   |
|         | 23       | 0.9    | 0.95   |
|         | 24       | 0.9    | 0.99   |
|         | 25       |        |        |
|         | 26       |        |        |
|         | 27       |        |        |
|         | 28       | 0.93   | 0.97   |
|         | 1        |        |        |
|         | 2        |        |        |
|         | 3        | 0.84   | 0.99   |
|         | 4        | 0.75   | 0.95   |
|         | 5        | 0.77   | 0.95   |
|         | 6        | 0.68   | 0.96   |
|         | 7        | 0.78   | 0.95   |
|         | 8        | 0.82   | 0.97   |
|         | 9        | 0.87   | 0.97   |
|         | 10       | 0.82   | 0.97   |
|         | 11       | 0.85   | 0.97   |
|         | 12       | 0.83   | 0.96   |
|         | 13       | 0.7    | 0.96   |
| CHD     | 14       | 0.85   | 0.99   |
|         | 15       |        |        |
|         | 16       | 0.62   | 0.94   |

|    |      |      |
|----|------|------|
| 17 | 0.89 | 1    |
| 18 | 0.64 | 0.92 |
| 19 |      |      |
| 20 | 0.78 | 0.96 |
| 21 | 0.62 | 0.9  |
| 22 |      |      |
| 23 | 0.81 | 0.97 |
| 24 | 0.8  | 0.98 |
| 25 | 0.85 | 0.99 |
| 26 | 0.65 | 1    |
| 27 | 0.89 | 0.96 |

---
