# Supplementary material for: DNA methylation abnormalities of imprinted genes in congenital heart disease: a pilot study
Source: PubMed Central journal article supplement (PMC7789576; doi:10.1186/s12920-020-00848-0), 2021-01-06
Supplement: 12920_2020_848_MOESM15_ESM.pdf [file 12920_2020_848_MOESM15_ESM.pdf]

Table S6.1 CpG sites methylation level of PEG10 in CHD patients and healthy individuals

| Groups  | SampleID | CpG_1 | CpG_2 | CpG_3 | CpG_4 | CpG_5 | CpG_6 | CpG_7 |
|---------|----------|-------|-------|-------|-------|-------|-------|-------|
| Control | 1        | 0.37  | 0.13  | 0.84  | 0.49  | 0.46  | 0.49  | 0.54  |
|         | 2        | 0.39  | 0.13  | 1     | 0.49  | 0.52  | 0.49  | 0.54  |
|         | 3        | 0.44  | 0.25  | 0.6   | 0.48  | 0.52  | 0.48  | 0.57  |
|         | 4        |       |       |       |       |       |       |       |
|         | 5        | 0.38  | 0.21  | 0.79  | 0.46  | 0.48  | 0.46  | 0.51  |
|         | 6        | 0.49  | 0.19  | 0.91  | 0.56  | 0.61  | 0.56  | 0.61  |
|         | 7        |       |       |       |       |       |       |       |
|         | 8        | 0.52  | 0.14  | 1     | 0.6   | 0.65  | 0.6   | 0.67  |
|         | 9        | 0.43  | 0.17  | 0.46  | 0.47  | 0.44  | 0.47  | 0.5   |
|         | 10       | 0.39  | 0.19  | 1     | 0.52  | 0.46  | 0.52  | 0.54  |
|         | 11       | 0.47  | 0.27  | 0.48  | 0.49  | 0.56  | 0.49  | 0.55  |
|         | 12       |       |       |       |       |       |       |       |
|         | 13       | 0.44  | 0.21  | 0.33  | 0.46  | 0.52  | 0.46  | 0.55  |
|         | 14       | 0.47  | 0.22  | 0.89  | 0.52  | 0.56  | 0.52  | 0.65  |
|         | 15       | 0.48  | 0.53  | 0.94  | 0.55  | 0.69  | 0.55  | 0.61  |
|         | 16       |       |       |       |       |       |       |       |
|         | 17       | 0.5   | 0.25  | 1     | 0.54  | 0.56  | 0.54  | 0.6   |
|         | 18       | 0.39  | 0.12  | 0.94  | 0.44  | 0.42  | 0.44  | 0.56  |
|         | 19       |       |       |       |       |       |       |       |
|         | 20       |       |       |       |       |       |       |       |
|         | 21       | 0.49  | 0.26  | 0.7   | 0.49  | 0.55  | 0.49  | 0.57  |
|         | 22       | 0.46  | 0.36  | 0.54  | 0.54  | 0.55  | 0.54  | 0.62  |
|         | 23       | 0.49  | 0.3   | 0.73  | 0.59  | 0.59  | 0.59  | 0.65  |
|         | 24       | 0.44  | 0.08  | 1     | 0.59  | 0.57  | 0.59  | 0.74  |
|         | 25       | 0.54  | 0.23  | 0.84  | 0.58  | 0.66  | 0.58  | 0.69  |
|         | 26       | 0.4   | 0.15  | 0.83  | 0.52  | 0.54  | 0.52  | 0.58  |
|         | 27       | 0.53  | 0.25  | 0.97  | 0.65  | 0.71  | 0.65  | 0.74  |
|         | 28       | 0.54  | 0.29  | 1     | 0.6   | 0.61  | 0.6   | 0.66  |
| CHD     | 1        | 0.41  | 0.31  | 0.4   | 0.51  | 0.54  | 0.51  | 0.52  |
|         | 2        | 0.33  | 0.27  | 0.37  | 0.43  | 0.39  | 0.43  | 0.39  |
|         | 3        | 0.34  | 0.22  | 0.41  | 0.42  | 0.44  | 0.42  | 0.46  |
|         | 4        | 0.38  | 0.3   | 0.4   | 0.42  | 0.42  | 0.42  | 0.46  |
|         | 5        | 0.35  | 0.3   | 0.51  | 0.44  | 0.42  | 0.44  | 0.48  |
|         | 6        | 0.41  | 0.36  | 0.47  | 0.48  | 0.48  | 0.48  | 0.51  |
|         | 7        | 0.38  | 0.28  | 0.83  | 0.49  | 0.49  | 0.49  | 0.49  |
|         | 8        | 0.44  | 0.38  | 0.49  | 0.49  | 0.48  | 0.49  | 0.53  |
|         | 9        | 0.37  | 0.29  | 0.6   | 0.5   | 0.53  | 0.5   | 0.51  |
|         | 10       |       |       |       |       |       |       |       |
|         | 11       |       |       |       |       |       |       |       |
|         | 12       | 0.34  | 0.27  | 0.42  | 0.44  | 0.44  | 0.44  | 0.47  |
|         | 13       | 0.31  | 0.28  | 0.34  | 0.46  | 0.48  | 0.46  | 0.46  |
|         | 14       | 0.37  | 0.34  | 0.62  | 0.48  | 0.48  | 0.48  | 0.5   |
|         | 15       | 0.46  | 0.38  | 0.52  | 0.51  | 0.52  | 0.51  | 0.53  |
|         | 16       | 0.46  | 0.47  | 0.51  | 0.5   | 0.5   | 0.5   | 0.52  |
|         | 17       | 0.39  | 0.29  | 0.46  | 0.46  | 0.46  | 0.46  | 0.48  |

|    |      |      |      |      |      |      |      |
|----|------|------|------|------|------|------|------|
| 18 | 0.34 | 0.2  | 0.51 | 0.45 | 0.45 | 0.45 | 0.47 |
| 19 | 0.36 | 0.25 | 0.44 | 0.45 | 0.45 | 0.45 | 0.46 |
| 20 | 0.35 | 0.34 | 0.62 | 0.5  | 0.49 | 0.5  | 0.48 |
| 21 | 0.32 | 0.22 | 0.45 | 0.48 | 0.48 | 0.48 | 0.44 |
| 22 | 0.56 | 0.54 | 1    | 0.65 | 0.6  | 0.65 | 0.57 |
| 23 | 0.39 | 0.31 | 0.51 | 0.48 | 0.5  | 0.48 | 0.52 |
| 24 | 0.41 | 0.27 | 0.42 | 0.45 | 0.46 | 0.45 | 0.49 |
| 25 | 0.39 | 0.26 | 0.38 | 0.44 | 0.46 | 0.44 | 0.48 |
| 26 | 0.43 | 0.31 | 0.45 | 0.46 | 0.45 | 0.46 | 0.47 |
| 27 | 0.4  | 0.29 | 0.37 | 0.43 | 0.43 | 0.43 | 0.45 |

---

Table S6.2 CpG sites methylation level of PEG10 in CHD patients and healthy individuals

| Groups  | SampleID | CpG_8 | CpG_9 | CpG_10.11.12 |
|---------|----------|-------|-------|--------------|
| Control | 1        | 0.49  | 0.51  | 0.2          |
|         | 2        | 0.49  | 0.58  | 0.25         |
|         | 3        | 0.48  | 0.52  | 0.28         |
|         | 4        |       |       |              |
|         | 5        | 0.46  | 0.39  | 0.24         |
|         | 6        | 0.56  | 0.5   | 0.27         |
|         | 7        |       |       |              |
|         | 8        | 0.6   | 0.55  | 0.13         |
|         | 9        | 0.47  | 0.49  | 0.27         |
|         | 10       | 0.52  | 0.55  | 0.14         |
|         | 11       | 0.49  | 0.61  | 0.41         |
|         | 12       |       |       |              |
|         | 13       | 0.46  | 0.57  | 0.36         |
|         | 14       | 0.52  | 0.6   | 0.16         |
|         | 15       | 0.55  | 0.88  | 0.5          |
|         | 16       |       |       |              |
|         | 17       | 0.54  | 0.7   | 0.26         |
|         | 18       | 0.44  | 0.53  | 0.2          |
|         | 19       |       |       |              |
|         | 20       |       |       |              |
|         | 21       | 0.49  | 0.53  | 0.27         |
|         | 22       | 0.54  | 0.6   | 0.32         |
|         | 23       | 0.59  | 0.67  | 0.37         |
|         | 24       | 0.59  | 0.91  | 0.06         |
|         | 25       | 0.58  | 0.65  | 0.25         |
|         | 26       | 0.52  | 0.53  | 0.16         |
|         | 27       | 0.65  | 0.77  | 0.15         |
|         | 28       | 0.6   | 0.71  | 0.28         |
| CHD     | 1        | 0.51  | 0.63  | 0.47         |
|         | 2        | 0.43  | 0.45  | 0.37         |
|         | 3        | 0.42  | 0.48  | 0.3          |
|         | 4        | 0.42  | 0.47  | 0.35         |
|         | 5        | 0.44  | 0.54  | 0.42         |
|         | 6        | 0.48  | 0.55  | 0.45         |
|         | 7        | 0.49  | 0.55  | 0.47         |
|         | 8        | 0.49  | 0.52  | 0.46         |
|         | 9        | 0.5   | 0.56  | 0.44         |
|         | 10       |       |       |              |
|         | 11       |       |       |              |
|         | 12       | 0.44  | 0.46  | 0.34         |
|         | 13       | 0.46  | 0.49  | 0.33         |
|         | 14       | 0.48  | 0.56  | 0.43         |
|         | 15       | 0.51  | 0.62  | 0.53         |
|         | 16       | 0.5   | 0.55  | 0.5          |
|         | 17       | 0.46  | 0.53  | 0.36         |

|    |      |      |      |
|----|------|------|------|
| 18 | 0.45 | 0.48 | 0.32 |
| 19 | 0.45 | 0.44 | 0.37 |
| 20 | 0.5  | 0.56 | 0.45 |
| 21 | 0.48 | 0.5  | 0.31 |
| 22 | 0.65 | 1    | 0.6  |
| 23 | 0.48 | 0.52 | 0.41 |
| 24 | 0.45 | 0.48 | 0.35 |
| 25 | 0.44 | 0.52 | 0.36 |
| 26 | 0.46 | 0.51 | 0.39 |
| 27 | 0.43 | 0.47 | 0.35 |

---
