# Supplementary material for: DNA methylation abnormalities of imprinted genes in congenital heart disease: a pilot study
Source: PubMed Central journal article supplement (PMC7789576; doi:10.1186/s12920-020-00848-0), 2021-01-06
Supplement: 12920_2020_848_MOESM16_ESM.pdf [file 12920_2020_848_MOESM16_ESM.pdf]

Table S7 CpG sites methylation level of MCST2 in CHD patients and healthy individuals

| Groups  | SampleID | CpG_1.2.3.4 | CpG_5.6 | CpG_7.8 | CpG_9.10 | CpG_11.12 | CpG_13 | CpG_14 |
|---------|----------|-------------|---------|---------|----------|-----------|--------|--------|
| Control | 1        | 0.26        | 0.26    | 0.3     | 0.35     | 0.31      | 0.37   | 0.37   |
|         | 2        | 0.29        | 0.22    | 0.36    | 0.34     | 0.3       | 0.35   | 0.42   |
|         | 3        | 0.23        | 0.25    | 0.3     | 0.3      | 0.27      | 0.31   | 0.34   |
|         | 4        | 0.32        | 0.29    | 0.34    | 0.33     | 0.3       | 0.36   | 0.44   |
|         | 5        | 0.22        | 0.22    | 0.22    | 0.3      | 0.23      | 0.31   | 0.43   |
|         | 6        | 0.3         | 0.26    | 0.32    | 0.32     | 0.31      | 0.31   | 0.43   |
|         | 7        | 0.27        | 0.3     | 0.3     | 0.29     | 0.32      | 0.33   | 0.37   |
|         | 8        | 0.27        | 0.27    | 0.29    | 0.3      | 0.28      | 0.32   | 0.39   |
|         | 9        |             |         |         |          |           |        |        |
|         | 10       | 0.33        | 0.27    | 0.33    | 0.36     | 0.31      | 0.32   | 0.46   |
|         | 11       | 0.28        | 0.27    | 0.29    | 0.35     | 0.3       | 0.31   | 0.45   |
|         | 12       | 0.28        | 0.28    | 0.3     | 0.34     | 0.32      | 0.36   | 0.41   |
|         | 13       | 0.21        | 0.24    | 0.24    | 0.36     | 0.23      | 0.3    | 0.4    |
|         | 14       | 0.27        | 0.27    | 0.27    | 0.38     | 0.27      | 0.32   | 0.43   |
|         | 15       | 0.25        | 0.24    | 0.27    | 0.31     | 0.23      | 0.31   | 0.37   |
|         | 16       | 0.34        | 0.3     | 0.37    | 0.39     | 0.35      | 0.38   | 0.49   |
|         | 17       |             |         |         |          |           |        |        |
|         | 18       | 0.32        | 0.24    | 0.33    | 0.36     | 0.28      | 0.36   | 0.48   |
|         | 19       | 0.28        | 0.26    | 0.28    | 0.36     | 0.28      | 0.33   | 0.44   |
|         | 20       |             |         |         |          |           |        |        |
|         | 21       | 0.29        | 0.33    | 0.31    | 0.36     | 0.33      | 0.35   | 0.42   |
|         | 22       | 0.31        | 0.27    | 0.35    | 0.36     | 0.32      | 0.34   | 0.49   |
|         | 23       | 0.27        | 0.28    | 0.31    | 0.33     | 0.27      | 0.31   | 0.41   |
|         | 24       | 0.28        | 0.31    | 0.32    | 0.38     | 0.33      | 0.33   | 0.5    |
|         | 25       | 0.25        | 0.24    | 0.27    | 0.31     | 0.27      | 0.33   | 0.38   |
|         | 26       | 0.3         | 0.28    | 0.31    | 0.33     | 0.31      | 0.34   | 0.49   |
|         | 27       | 0.31        | 0.32    | 0.34    | 0.38     | 0.36      | 0.38   | 0.49   |
|         | 28       | 0.38        | 0.29    | 0.36    | 0.4      | 0.36      | 0.34   | 0.5    |
| CHD     | 1        | 0.27        | 0.28    | 0.31    | 0.42     | 0.29      | 0.33   | 0.51   |
|         | 2        | 0.3         | 0.28    | 0.32    | 0.36     | 0.3       | 0.37   | 0.41   |
|         | 3        | 0.27        | 0.28    | 0.28    | 0.38     | 0.29      | 0.34   | 0.43   |
|         | 4        | 0.43        | 0.35    | 0.4     | 0.42     | 0.44      | 0.41   | 0.66   |
|         | 5        | 0.3         | 0.3     | 0.33    | 0.34     | 0.29      | 0.36   | 0.41   |
|         | 6        | 0.33        | 0.29    | 0.32    | 0.35     | 0.34      | 0.39   | 0.39   |
|         | 7        | 0.31        | 0.34    | 0.33    | 0.38     | 0.34      | 0.36   | 0.48   |
|         | 8        | 0.34        | 0.32    | 0.37    | 0.4      | 0.34      | 0.36   | 0.44   |
|         | 9        | 0.29        | 0.26    | 0.3     | 0.36     | 0.29      | 0.34   | 0.42   |
|         | 10       | 0.3         | 0.3     | 0.31    | 0.37     | 0.33      | 0.37   | 0.54   |
|         | 11       | 0.25        | 0.24    | 0.24    | 0.34     | 0.26      | 0.32   | 0.4    |
|         | 12       | 0.25        | 0.26    | 0.27    | 0.33     | 0.27      | 0.35   | 0.41   |
|         | 13       | 0.27        | 0.29    | 0.29    | 0.34     | 0.32      | 0.34   | 0.44   |
|         | 14       |             |         |         |          |           |        |        |
|         | 15       | 0.3         | 0.32    | 0.3     | 0.3      | 0.33      | 0.37   | 0.47   |
|         | 16       | 0.3         | 0.29    | 0.33    | 0.35     | 0.34      | 0.36   | 0.43   |
|         | 17       | 0.32        | 0.27    | 0.28    | 0.39     | 0.26      | 0.34   | 0.54   |
|         | 18       | 0.22        | 0.25    | 0.26    | 0.32     | 0.26      | 0.32   | 0.36   |

|    |      |      |      |      |      |      |      |
|----|------|------|------|------|------|------|------|
| 19 | 0.28 | 0.22 | 0.27 | 0.28 | 0.25 | 0.31 | 0.42 |
| 20 | 0.28 | 0.25 | 0.31 | 0.33 | 0.29 | 0.33 | 0.45 |
| 21 | 0.3  | 0.3  | 0.28 | 0.39 | 0.26 | 0.37 | 0.5  |
| 22 |      |      |      |      |      |      |      |
| 23 | 0.29 | 0.27 | 0.28 | 0.3  | 0.33 | 0.33 | 0.4  |
| 24 | 0.3  | 0.33 | 0.33 | 0.39 | 0.36 | 0.38 | 0.48 |
| 25 | 0.24 | 0.24 | 0.3  | 0.35 | 0.3  | 0.33 | 0.42 |
| 26 | 0.25 | 0.25 | 0.32 | 0.35 | 0.29 | 0.34 | 0.38 |
| 27 | 0.24 | 0.23 | 0.27 | 0.3  | 0.26 | 0.31 | 0.4  |

---
