# Supplementary material for: DNA methylation abnormalities of imprinted genes in congenital heart disease: a pilot study
Source: PubMed Central journal article supplement (PMC7789576; doi:10.1186/s12920-020-00848-0), 2021-01-06
Supplement: 12920_2020_848_MOESM17_ESM.pdf [file 12920_2020_848_MOESM17_ESM.pdf]

Table S8 CpG sites methylation level of NNAT in CHD patients and healthy individuals

| Groups  | SampleID | CpG_1 | CpG_2.3 | CpG_4 |
|---------|----------|-------|---------|-------|
|         | 1        | 1     | 0.6     | 0.77  |
|         | 2        | 1     | 0.98    | 0.92  |
|         | 3        |       |         |       |
|         | 4        | 1     | 0.98    | 0.83  |
|         | 5        | 0.99  | 0.98    | 0.87  |
|         | 6        | 1     | 0.97    | 0.82  |
|         | 7        | 0.82  | 0.76    | 0.8   |
|         | 8        | 0.7   | 0.68    | 0.71  |
|         | 9        |       |         |       |
|         | 10       | 1     | 0.97    | 0.86  |
|         | 11       |       |         |       |
|         | 12       | 1     | 0.97    | 0.79  |
|         | 13       | 0.43  | 0.98    | 0.82  |
| Control | 14       | 1     | 0.96    | 0.85  |
|         | 15       |       |         |       |
|         | 16       |       |         |       |
|         | 17       | 1     | 0.98    | 0.88  |
|         | 18       |       |         |       |
|         | 19       |       |         |       |
|         | 20       |       |         |       |
|         | 21       | 0.89  | 0.98    | 0.91  |
|         | 22       | 0.96  | 0.98    | 0.92  |
|         | 23       | 1     | 0.97    | 0.9   |
|         | 24       | 0.72  | 0.21    | 0.82  |
|         | 25       | 0.74  | 0.99    | 0.88  |
|         | 26       | 0.93  | 0.98    | 0.88  |
|         | 27       | 1     | 0.98    | 0.96  |
|         | 28       | 1     | 0.99    | 0.9   |
|         | 1        | 0.89  | 0.98    | 0.87  |
|         | 2        | 1     | 0.98    | 0.85  |
|         | 3        | 1     | 0.97    | 0.83  |
|         | 4        |       |         |       |
|         | 5        | 0.83  | 0.6     | 0.82  |
|         | 6        | 0.19  | 0.14    | 0.62  |
|         | 7        | 1     | 0.98    | 0.89  |
|         | 8        | 1     | 0.98    | 0.88  |
|         | 9        | 0.86  | 0.98    | 0.91  |
|         | 10       | 1     | 0.97    | 0.94  |
|         | 11       | 1     | 0.97    | 0.81  |
|         | 12       | 1     | 0.82    | 0.86  |
|         | 13       | 1     | 0.98    | 0.86  |
| CHD     | 14       | 0.39  | 0.98    | 0.91  |
|         | 15       |       |         |       |
|         | 16       | 1     | 0.97    | 0.86  |
|         | 17       | 1     | 0.97    | 0.84  |

|    |      |      |      |
|----|------|------|------|
| 18 | 1    | 0.97 | 0.91 |
| 19 | 0.54 | 0.97 | 0.79 |
| 20 | 0.8  | 0.97 | 0.83 |
| 21 | 1    | 0.97 | 0.89 |
| 22 | 0.98 | 0.98 | 0.92 |
| 23 | 1    | 0.97 | 0.79 |
| 24 |      |      |      |
| 25 | 1    | 0.98 | 0.91 |
| 26 | 1    | 0.99 | 0.84 |
| 27 | 1    | 0.98 | 0.91 |

---
