# Supplementary material for: DNA methylation abnormalities of imprinted genes in congenital heart disease: a pilot study
Source: PubMed Central journal article supplement (PMC7789576; doi:10.1186/s12920-020-00848-0), 2021-01-06
Supplement: 12920_2020_848_MOESM18_ESM.pdf [file 12920_2020_848_MOESM18_ESM.pdf]

Table S9 CpG sites methylation level of NAP1L5 in CHD patients and healthy individuals

| Groups  | SampleID | CpG_1 | CpG_2 | CpG_3 | CpG_4 | CpG_5 | CpG_6 | CpG_7 |
|---------|----------|-------|-------|-------|-------|-------|-------|-------|
| Control | 1        | 1     | 0.97  | 0.99  | 0.53  | 0.31  | 0.49  | 0.54  |
|         | 2        | 1     | 0.96  | 0.9   | 0.55  | 0.31  | 0.5   | 0.55  |
|         | 3        | 0.99  | 0.99  | 0.96  | 0.57  | 0.34  | 0.5   | 0.57  |
|         | 4        | 1     | 0.94  | 0.89  | 0.54  | 0.28  | 0.5   | 0.54  |
|         | 5        | 0.97  | 0.98  | 1     | 0.68  | 0.31  | 0.52  | 0.58  |
|         | 6        | 1     | 0.94  | 0.93  | 0.57  | 0.29  | 0.47  | 0.51  |
|         | 7        | 1     | 0.95  | 1     | 0.71  | 0.29  | 0.49  | 0.55  |
|         | 8        | 1     | 0.96  | 0.92  | 0.6   | 0.29  | 0.49  | 0.51  |
|         | 9        |       |       |       |       |       |       |       |
|         | 10       | 1     | 0.98  | 0.97  | 0.68  | 0.31  | 0.5   | 0.55  |
|         | 11       |       |       |       |       |       |       |       |
|         | 12       | 1     | 0.98  | 0.88  | 0.58  | 0.32  | 0.44  | 0.54  |
|         | 13       | 0.97  | 0.97  | 0.93  | 0.66  | 0.31  | 0.51  | 0.55  |
|         | 14       | 0.96  | 0.98  | 1     | 0.72  | 0.24  | 0.45  | 0.33  |
|         | 15       | 1     | 0.95  | 0.95  | 0.65  | 0.33  | 0.54  | 0.57  |
|         | 16       |       |       |       |       |       |       |       |
|         | 17       | 0.99  | 0.94  | 0.88  | 0.72  | 0.35  | 0.57  | 0.63  |
|         | 18       | 0.82  | 0.91  | 1     | 0.5   | 0.3   | 0.52  | 0.57  |
|         | 19       |       |       |       |       |       |       |       |
|         | 20       |       |       |       |       |       |       |       |
|         | 21       | 0.9   | 0.95  | 0.86  | 0.52  | 0.27  | 0.51  | 0.54  |
|         | 22       | 0.83  | 0.96  | 0.91  | 0.58  | 0.32  | 0.55  | 0.55  |
|         | 23       | 0.83  | 0.96  | 0.96  | 0.65  | 0.3   | 0.56  | 0.61  |
|         | 24       | 0.76  | 0.93  | 0.19  | 0.42  | 0.34  | 0.52  | 0.58  |
|         | 25       | 1     | 0.91  | 1     | 1     | 0.29  | 0.51  | 0.57  |
|         | 26       | 1     | 0.98  | 0.97  | 0.54  | 0.29  | 0.51  | 0.49  |
|         | 27       | 1     | 0.94  | 0.98  | 0.89  | 0.33  | 0.6   | 0.57  |
|         | 28       | 1     | 0.98  | 0.95  | 0.65  | 0.29  | 0.49  | 0.55  |
| CHD     | 1        | 1     | 0.98  | 0.87  | 0.64  | 0.36  | 0.55  | 0.59  |
|         | 2        | 0.74  | 0.95  | 0.81  | 0.63  | 0.29  | 0.48  | 0.54  |
|         | 3        | 0.89  | 0.95  | 0.94  | 0.58  | 0.36  | 0.55  | 0.58  |
|         | 4        | 0.54  | 0.87  | 0.17  | 0.29  | 0.3   | 0.49  | 0.55  |
|         | 5        | 0.38  | 0.96  | 0.82  | 0.29  | 0.34  | 0.53  | 0.56  |
|         | 6        |       |       |       |       |       |       |       |
|         | 7        | 0.98  | 0.96  | 0.95  | 0.57  | 0.34  | 0.52  | 0.54  |
|         | 8        | 0.87  | 0.99  | 0.84  | 0.68  | 0.32  | 0.55  | 0.55  |
|         | 9        | 0.68  | 0.95  | 0.49  | 0.52  | 0.35  | 0.53  | 0.6   |
|         | 10       | 0.27  | 0.92  | 0.47  | 0.27  | 0.33  | 0.52  | 0.54  |
|         | 11       |       |       |       |       |       |       |       |
|         | 12       |       |       |       |       |       |       |       |
|         | 13       | 0.85  | 0.98  | 0.52  | 0.57  | 0.35  | 0.46  | 0.55  |
|         | 14       |       |       |       |       |       |       |       |
|         | 15       |       |       |       |       |       |       |       |
|         | 16       | 0.42  | 0.62  | 0.08  | 0.44  | 0.32  | 0.5   | 0.54  |
|         | 17       | 0.71  | 0.69  | 0.07  | 0.61  | 0.29  | 0.47  | 0.5   |
|         | 18       | 0.93  | 0.95  | 0.93  | 0.64  | 0.32  | 0.49  | 0.55  |

|    |      |      |      |      |      |      |      |
|----|------|------|------|------|------|------|------|
| 19 | 1    | 0.96 | 0.79 | 0.58 | 0.35 | 0.53 | 0.55 |
| 20 | 1    | 0.98 | 0.94 | 0.71 | 0.33 | 0.42 | 0.52 |
| 21 |      |      |      |      |      |      |      |
| 22 | 0.32 | 1    | 0.49 | 0.38 | 0.33 | 0.52 | 0.53 |
| 23 | 0.77 | 0.92 | 0.9  | 0.86 | 0.39 | 0.64 | 0.59 |
| 24 |      |      |      |      |      |      |      |
| 25 | 0.88 | 1    | 0.95 | 0.64 | 0.3  | 0.45 | 0.54 |
| 26 | 0.86 | 0.91 | 0.98 | 0.74 | 0.3  | 0.5  | 0.55 |
| 27 | 1    | 0.97 | 0.99 | 0.88 | 0.34 | 0.52 | 0.55 |

---
