# Supplementary material for: DNA methylation abnormalities of imprinted genes in congenital heart disease: a pilot study
Source: PubMed Central journal article supplement (PMC7789576; doi:10.1186/s12920-020-00848-0), 2021-01-06
Supplement: 12920_2020_848_MOESM19_ESM.pdf [file 12920_2020_848_MOESM19_ESM.pdf]

Table S10.1 CpG sites methylation level of NESP in CHD patients and healthy individuals

| Groups  | SampleID | CpG_1 | CpG_2 | CpG_3 | CpG_4.5 | CpG_6 | CpG_7 | CpG_8.9.10 |
|---------|----------|-------|-------|-------|---------|-------|-------|------------|
| Control | 1        | 0.47  | 0.45  | 0.45  | 0.31    | 0.46  | 0.37  | 0.39       |
|         | 2        | 0.43  | 0.45  | 0.42  | 0.37    | 0.47  | 0.39  | 0.48       |
|         | 3        | 0.44  | 0.48  | 0.48  | 0.42    | 0.45  | 0.38  | 0.41       |
|         | 4        | 0.44  | 0.34  | 0.42  | 0.35    | 0.47  | 0.34  | 0.4        |
|         | 5        |       |       |       |         |       |       |            |
|         | 6        |       |       |       |         |       |       |            |
|         | 7        |       |       |       |         |       |       |            |
|         | 8        | 0.47  | 0.38  | 0.44  | 0.37    | 0.48  | 0.35  | 0.41       |
|         | 9        | 0.47  | 0.42  | 0.38  | 0.29    | 0.42  | 0.38  | 0.43       |
|         | 10       | 0.46  | 0.4   | 0.42  | 0.33    | 0.42  | 0.38  | 0.47       |
|         | 11       |       |       |       |         |       |       |            |
|         | 12       | 0.93  | 0.34  | 0.37  | 0.3     | 0.41  | 0.4   | 0.44       |
|         | 13       | 0.44  | 0.43  | 0.45  | 0.38    | 0.39  | 0.34  | 0.38       |
|         | 14       | 0.83  | 0.45  | 0.45  | 0.39    | 0.45  | 0.38  | 0.44       |
|         | 15       | 0.45  | 0.44  | 0.43  | 0.35    | 0.45  | 0.38  | 0.46       |
|         | 16       | 0.45  | 0.42  | 0.48  | 0.32    | 0.45  | 0.35  | 0.4        |
|         | 17       | 0.43  | 0.46  | 0.46  | 0.35    | 0.41  | 0.4   | 0.46       |
|         | 18       | 0.45  | 0.57  | 0.54  | 0.47    | 0.46  | 0.41  | 0.46       |
|         | 19       | 0.46  | 0.49  | 0.49  | 0.36    | 0.47  | 0.42  | 0.5        |
|         | 20       |       |       |       |         |       |       |            |
|         | 21       | 0.74  | 0.51  | 0.46  | 0.43    | 0.45  | 0.41  | 0.47       |
|         | 22       | 0.4   | 0.37  | 0.4   | 0.29    | 0.45  | 0.34  | 0.39       |
|         | 23       | 0.52  | 0.5   | 0.52  | 0.44    | 0.4   | 0.4   | 0.46       |
|         | 24       | 0.49  | 0.49  | 0.45  | 0.44    | 0.43  | 0.37  | 0.44       |
|         | 25       | 0.42  | 0.46  | 0.46  | 0.36    | 0.43  | 0.43  | 0.51       |
|         | 26       | 0.42  | 0.39  | 0.39  | 0.31    | 0.42  | 0.39  | 0.44       |
|         | 27       | 0.38  | 0.41  | 0.39  | 0.31    | 0.45  | 0.47  | 0.52       |
|         | 28       | 0.42  | 0.43  | 0.41  | 0.4     | 0.49  | 0.4   | 0.44       |
| CHD     | 1        |       |       |       |         |       |       |            |
|         | 2        |       |       |       |         |       |       |            |
|         | 3        |       |       |       |         |       |       |            |
|         | 4        |       |       |       |         |       |       |            |
|         | 5        |       |       |       |         |       |       |            |
|         | 6        | 0.57  | 0.47  | 0.44  | 0.3     | 0.39  | 0.27  | 0.26       |
|         | 7        |       |       |       |         |       |       |            |
|         | 8        | 0.52  | 0.37  | 0.43  | 0.3     | 0.41  | 0.27  | 0.28       |
|         | 9        |       |       |       |         |       |       |            |
|         | 10       |       |       |       |         |       |       |            |
|         | 11       |       |       |       |         |       |       |            |
|         | 12       |       |       |       |         |       |       |            |
|         | 13       | 0.51  | 0.29  | 0.41  | 0.28    | 0.39  | 0.29  | 0.3        |
|         | 14       |       |       |       |         |       |       |            |
|         | 15       |       |       |       |         |       |       |            |
|         | 16       |       |       |       |         |       |       |            |

|    |         |      |      |      |      |      |      |
|----|---------|------|------|------|------|------|------|
| 17 | 0.47    | 0.38 | 0.41 | 0.38 | 0.44 | 0.28 | 0.33 |
| 18 | 0.42 NA |      | 0.37 | 0.3  | 0.39 | 0.25 | 0.29 |
| 19 |         |      |      |      |      |      |      |
| 20 | 0.56 NA |      | 0.41 | 0.3  | 0.4  | 0.23 | 0.22 |
| 21 |         |      |      |      |      |      |      |
| 22 | 0.5     | 0.37 | 0.42 | 0.34 | 0.41 | 0.27 | 0.3  |
| 23 |         |      |      |      |      |      |      |
| 24 |         |      |      |      |      |      |      |
| 25 |         |      |      |      |      |      |      |
| 26 |         |      |      |      |      |      |      |
| 27 |         |      |      |      |      |      |      |

---

Table S10.2 CpG sites methylation level of NESP in CHD patients and healthy individuals

| Groups  | SampleID | CpG_11.1:CpG_13 | CpG_14 | CpG_15 | CpG_16 | CpG_17.18.19.20.21.22 |      |
|---------|----------|-----------------|--------|--------|--------|-----------------------|------|
| Control | 1        | 0.36            | 0.43   | 0.31   | 0.36   | 0.38                  | 0.3  |
|         | 2        | 0.4             | 0.46   | 0.31   | 0.42   | 0.44                  | 0.32 |
|         | 3        | 0.37            | 0.5    | 0.34   | 0.43   | 0.43                  | 0.31 |
|         | 4        | 0.33            | 0.44   | 0.27   | 0.36   | 0.39                  | 0.25 |
|         | 5        |                 |        |        |        |                       |      |
|         | 6        |                 |        |        |        |                       |      |
|         | 7        |                 |        |        |        |                       |      |
|         | 8        | 0.33            | 0.46   | 0.24   | 0.34   | 0.36                  | 0.31 |
|         | 9        | 0.34            | 0.52   | 0.3    | 0.37   | 0.37                  | 0.27 |
|         | 10       | 0.43            | 0.43   | 0.35   | 0.41   | 0.39                  | 0.47 |
|         | 11       |                 |        |        |        |                       |      |
|         | 12       | 0.41            | 0.45   | 0.4    | 0.43   | 0.4                   | 0.42 |
|         | 13       | 0.32            | 0.44   | 0.25   | 0.31   | 0.31                  | 0.27 |
|         | 14       | 0.35            | 0.51   | 0.27   | 0.36   | 0.4                   | 0.29 |
|         | 15       | 0.37            | 0.55   | 0.3    | 0.38   | 0.4                   | 0.31 |
|         | 16       | 0.31            | 0.38   | 0.29   | 0.35   | 0.35                  | 0.32 |
|         | 17       | 0.4             | 0.47   | 0.41   | 0.43   | 0.42                  | 0.4  |
|         | 18       | 0.4             | 0.55   | 0.33   | 0.41   | 0.47                  | 0.33 |
|         | 19       | 0.43            | 0.5    | 0.46   | 0.46   | 0.42                  | 0.46 |
|         | 20       |                 |        |        |        |                       |      |
|         | 21       | 0.42            | 0.41   | 0.44   | 0.45   | 0.42                  | 0.41 |
|         | 22       | 0.29            | 0.5    | 0.26   | 0.37   | 0.37                  | 0.29 |
|         | 23       | 0.43            | 0.44   | 0.43   | 0.46   | 0.48                  | 0.4  |
|         | 24       | 0.39            | 0.56   | 0.3    | 0.39   | 0.45                  | 0.35 |
|         | 25       | 0.45            | 0.76   | 0.4    | 0.45   | 0.5                   | 0.44 |
|         | 26       | 0.41            | 0.43   | 0.36   | 0.43   | 0.4                   | 0.43 |
|         | 27       | 0.46            | 0.56   | 0.42   | 0.49   | 0.45                  | 0.38 |
|         | 28       | 0.39            | 0.57   | 0.38   | 0.39   | 0.42                  | 0.39 |
| CHD     | 1        |                 |        |        |        |                       |      |
|         | 2        |                 |        |        |        |                       |      |
|         | 3        |                 |        |        |        |                       |      |
|         | 4        |                 |        |        |        |                       |      |
|         | 5        |                 |        |        |        |                       |      |
|         | 6        | 0.27            | 0.24   | 0.18   | 0.21   | 0.24                  | 0.25 |
|         | 7        |                 |        |        |        |                       |      |
|         | 8        | 0.32            | 0.22   | 0.15   | NA     | 0.51                  | 0.29 |
|         | 9        |                 |        |        |        |                       |      |
|         | 10       |                 |        |        |        |                       |      |
|         | 11       |                 |        |        |        |                       |      |
|         | 12       |                 |        |        |        |                       |      |
|         | 13       | 0.29            | 0.29   | 0.22   | 0.22   | 0.24                  | 0.22 |
|         | 14       |                 |        |        |        |                       |      |
|         | 15       |                 |        |        |        |                       |      |
|         | 16       |                 |        |        |        |                       |      |

|    |      |      |      |      |      |      |
|----|------|------|------|------|------|------|
| 17 | 0.29 | 0.34 | 0.24 | 0.38 | 0.34 | 0.27 |
| 18 | 0.24 | 0.29 | 0.21 | 0.26 | 0.26 | 0.24 |
| 19 |      |      |      |      |      |      |
| 20 | 0.19 | 0.27 | 0.18 | 0.25 | 0.24 | 0.17 |
| 21 |      |      |      |      |      |      |
| 22 | 0.26 | 0.36 | 0.21 | 0.24 | 0.27 | 0.23 |
| 23 |      |      |      |      |      |      |
| 24 |      |      |      |      |      |      |
| 25 |      |      |      |      |      |      |
| 26 |      |      |      |      |      |      |
| 27 |      |      |      |      |      |      |

---

Table S10.3 CpG sites methylation level of NESP in CHD patients and healthy individuals

| Groups  | SampleID | CpG_23 |
|---------|----------|--------|
|         | 1        | 0.32   |
|         | 2        | 0.43   |
|         | 3        | 0.38   |
|         | 4        | 0.3    |
|         | 5        |        |
|         | 6        |        |
|         | 7        |        |
|         | 8        | 0.28   |
|         | 9        | 0.32   |
|         | 10       | 0.45   |
|         | 11       |        |
|         | 12       | 0.44   |
|         | 13       | 0.25   |
| Control | 14       | 0.32   |
|         | 15       | 0.34   |
|         | 16       | 0.32   |
|         | 17       | 0.38   |
|         | 18       | 0.35   |
|         | 19       | 0.45   |
|         | 20       |        |
|         | 21       | 0.45   |
|         | 22       | 0.32   |
|         | 23       | 0.48   |
|         | 24       | 0.32   |
|         | 25       | 0.41   |
|         | 26       | 0.37   |
|         | 27       | 0.43   |
|         | 28       | 0.32   |
|         | 1        |        |
|         | 2        |        |
|         | 3        |        |
|         | 4        |        |
|         | 5        |        |
|         | 6        | 0.22   |
|         | 7        |        |
|         | 8        | 0.47   |
|         | 9        |        |
|         | 10       |        |
|         | 11       |        |
|         | 12       |        |
|         | 13       | 0.22   |
| CHD     | 14       |        |
|         | 15       |        |
|         | 16       |        |

|    |      |
|----|------|
| 17 | 0.33 |
| 18 | 0.25 |
| 19 |      |
| 20 | 0.24 |
| 21 |      |
| 22 | 0.25 |
| 23 |      |
| 24 |      |
| 25 |      |
| 26 |      |
| 27 |      |

---
