# Supplementary material for: DNA methylation abnormalities of imprinted genes in congenital heart disease: a pilot study
Source: PubMed Central journal article supplement (PMC7789576; doi:10.1186/s12920-020-00848-0), 2021-01-06
Supplement: 12920_2020_848_MOESM20_ESM.pdf [file 12920_2020_848_MOESM20_ESM.pdf]

Table S11.1 CpG sites methylation level of NESPAS in CHD patients and healthy individuals

| Groups  | SampleID | CpG_1 | CpG_2 | CpG_3.4 | CpG_5 | CpG_6.7 | CpG_8 | CpG_9 |
|---------|----------|-------|-------|---------|-------|---------|-------|-------|
| Control | 1        |       |       |         |       |         |       |       |
|         | 2        | 0.3   | 0.4   | 0.05    | 0.41  | 0.29    | 0.27  | 0.41  |
|         | 3        | 0.38  | 0.37  | 0.13    | 0.4   | 0.37    | 0.48  | 0.48  |
|         | 4        | 0.4   | 0.46  | 0.09    | 0.49  | 0.42    | 0.53  | 0.49  |
|         | 5        | 0.31  | 0.37  | 0.13    | 0.34  | 0.32    | 0.28  | 0.42  |
|         | 6        | 0.31  | 0.39  | 0.06    | 0.38  | 0.3     | 0.33  | 0.42  |
|         | 7        |       |       |         |       |         |       |       |
|         | 8        | 0.39  | 0.38  | 0.14    | 0.38  | 0.35    | 0.39  | 0.52  |
|         | 9        |       |       |         |       |         |       |       |
|         | 10       | 0.33  | 0.42  | 0.15    | 0.42  | 0.37    | 0.37  | 0.47  |
|         | 11       |       |       |         |       |         |       |       |
|         | 12       | 0.34  | 0.36  | 0.14    | 0.39  | 0.39    | 0.38  | 0.45  |
|         | 13       |       |       |         |       |         |       |       |
|         | 14       |       |       |         |       |         |       |       |
|         | 15       | 0.33  | 0.41  | 0.13    | 0.37  | 0.36    | 0.42  | 0.43  |
|         | 16       |       |       |         |       |         |       |       |
|         | 17       | 0.35  | 0.43  | 0.11    | 0.43  | 0.39    | 0.38  | 0.49  |
|         | 18       |       |       |         |       |         |       |       |
|         | 19       | 0.4   | 0.41  | 0.1     | 0.42  | 0.42    | 0.47  | 0.48  |
|         | 20       |       |       |         |       |         |       |       |
|         | 21       | 0.37  | 0.47  | 0.16    | 0.46  | 0.41    | 0.45  | 0.49  |
|         | 22       | 0.4   | 0.42  | 0.16    | 0.44  | 0.4     | 0.35  | 0.48  |
|         | 23       | 0.37  | 0.42  | 0.13    | 0.4   | 0.37    | 0.4   | 0.48  |
|         | 24       | 0.42  | 0.43  | 0.12    | 0.44  | 0.45    | 0.53  | 0.51  |
|         | 25       | 0.39  | 0.42  | 0.1     | 0.48  | 0.39    | 0.47  | 0.53  |
|         | 26       | 0.4   | 0.35  | 0.14    | 0.38  | 0.37    | 0.44  | 0.45  |
|         | 27       | 0.43  | 0.42  | 0.14    | 0.46  | 0.44    | 0.44  | 0.51  |
|         | 28       | 0.41  | 0.54  | 0.19    | 0.45  | 0.53    | 0.44  | 0.47  |
| CHD     | 1        |       |       |         |       |         |       |       |
|         | 2        | 0.35  | 0.35  | 0.09    | 0.39  | 0.36    | 0.39  | 0.44  |
|         | 3        | 0.3   | 0.41  | 0.09    | 0.38  | 0.34    | 0.41  | 0.4   |
|         | 4        | 0.32  | 0.4   | 0.1     | 0.38  | 0.33    | 0.34  | 0.43  |
|         | 5        | 0.27  | 0.39  | 0.17    | 0.36  | 0.33    | 0.37  | 0.42  |
|         | 6        | 0.37  | 0.39  | 0.18    | 0.4   | 0.38    | 0.45  | 0.46  |
|         | 7        |       |       |         |       |         |       |       |
|         | 8        | 0.33  | 0.39  | 0.15    | 0.38  | 0.36    | 0.38  | 0.46  |
|         | 9        | 0.31  | 0.37  | 0.15    | 0.38  | 0.39    | 0.46  | 0.46  |
|         | 10       |       |       |         |       |         |       |       |
|         | 11       | 0.39  | 0.42  | 0.07    | 0.42  | 0.37    | 0.38  | 0.47  |
|         | 12       |       |       |         |       |         |       |       |
|         | 13       | 0.29  | 0.4   | 0.08    | 0.38  | 0.35    | 0.37  | 0.87  |
|         | 14       |       |       |         |       |         |       |       |
|         | 15       | 0.38  | 0.36  | 0.2     | 0.4   | 0.43    | 0.49  | 0.48  |
|         | 16       |       |       |         |       |         |       |       |
|         | 17       | 0.3   | 0.38  | 0.08    | 0.38  | 0.36    | 0.36  | 0.35  |

|    |      |      |      |      |      |      |      |
|----|------|------|------|------|------|------|------|
| 18 | 0.36 | 0.4  | 0.13 | 0.43 | 0.38 | 0.41 | 0.47 |
| 19 | 0.35 | 0.41 | 0.11 | 0.41 | 0.37 | 0.35 | 0.48 |
| 20 | 0.29 | 0.34 | 0.09 | 0.36 | 0.29 | 0.31 | 0.38 |
| 21 |      |      |      |      |      |      |      |
| 22 |      |      |      |      |      |      |      |
| 23 |      |      |      |      |      |      |      |
| 24 |      |      |      |      |      |      |      |
| 25 |      |      |      |      |      |      |      |
| 26 |      |      |      |      |      |      |      |
| 27 |      |      |      |      |      |      |      |

---

Table S11.2 CpG sites methylation level of NESPAS in CHD patients and healthy individuals

| Groups  | SampleID | CpG_10.1 | CpG_12 | CpG_13.1 | CpG_15 | CpG_16.17 |
|---------|----------|----------|--------|----------|--------|-----------|
| Control | 1        |          |        |          |        |           |
|         | 2        | 0.34     | 0.35   | 0.29     | 0.35   | 0.32      |
|         | 3        | 0.43     | 0.43   | 0.36     | 0.43   | 0.39      |
|         | 4        | 0.32     | 0.38   | 0.3      | 0.38   | 0.35      |
|         | 5        | 0.32     | 0.35   | 0.26     | 0.35   | 0.3       |
|         | 6        | 0.35     | 0.35   | 0.3      | 0.35   | 0.34      |
|         | 7        |          |        |          |        |           |
|         | 8        | 0.44     | 0.42   | 0.38     | 0.42   | 0.39      |
|         | 9        |          |        |          |        |           |
|         | 10       | 0.4      | 0.39   | 0.33     | 0.39   | 0.37      |
|         | 11       |          |        |          |        |           |
|         | 12       | 0.36     | 0.39   | 0.35     | 0.39   | 0.42      |
|         | 13       |          |        |          |        |           |
|         | 14       |          |        |          |        |           |
|         | 15       | 0.41     | 0.42   | 0.35     | 0.42   | 0.36      |
|         | 16       |          |        |          |        |           |
|         | 17       | 0.42     | 0.42   | 0.33     | 0.42   | 0.36      |
|         | 18       |          |        |          |        |           |
|         | 19       | 0.36     | 0.36   | 0.28     | 0.36   | 0.33      |
|         | 20       |          |        |          |        |           |
|         | 21       | 0.4      | 0.39   | 0.34     | 0.39   | 0.38      |
|         | 22       | 0.38     | 0.4    | 0.31     | 0.4    | 0.35      |
|         | 23       | 0.44     | 0.41   | 0.35     | 0.41   | 0.35      |
|         | 24       | 0.31     | 0.38   | 0.31     | 0.38   | 0.36      |
|         | 25       | 0.37     | 0.39   | 0.34     | 0.39   | 0.37      |
|         | 26       | 0.32     | 0.37   | 0.34     | 0.37   | 0.36      |
|         | 27       | 0.43     | 0.4    | 0.38     | 0.4    | 0.45      |
|         | 28       | 0.38     | 0.37   | 0.3      | 0.37   | 0.33      |
| CHD     | 1        |          |        |          |        |           |
|         | 2        | 0.4      | 0.39   | 0.36     | 0.39   | 0.39      |
|         | 3        | 0.42     | 0.36   | 0.3      | 0.36   | 0.38      |
|         | 4        | 0.38     | 0.36   | 0.32     | 0.36   | 0.36      |
|         | 5        | 0.41     | 0.4    | 0.34     | 0.4    | 0.38      |
|         | 6        | 0.42     | 0.4    | 0.38     | 0.4    | 0.38      |
|         | 7        |          |        |          |        |           |
|         | 8        | 0.45     | 0.46   | 0.33     | 0.46   | 0.38      |
|         | 9        | 0.35     | 0.35   | 0.3      | 0.35   | 0.32      |
|         | 10       |          |        |          |        |           |
|         | 11       | 0.39     | 0.38   | 0.31     | 0.38   | 0.36      |
|         | 12       |          |        |          |        |           |
|         | 13       | 0.32     | 0.32   | 0.28     | 0.32   | 0.3       |
|         | 14       |          |        |          |        |           |
|         | 15       | 0.46     | 0.45   | 0.44     | 0.45   | 0.44      |
|         | 16       |          |        |          |        |           |
|         | 17       | 0.36     | 0.38   | 0.36     | 0.38   | 0.4       |

|    |      |      |      |      |      |
|----|------|------|------|------|------|
| 18 | 0.37 | 0.39 | 0.31 | 0.39 | 0.35 |
| 19 | 0.3  | 0.34 | 0.28 | 0.34 | 0.34 |
| 20 | 0.36 | 0.36 | 0.31 | 0.36 | 0.37 |
| 21 |      |      |      |      |      |
| 22 |      |      |      |      |      |
| 23 |      |      |      |      |      |
| 24 |      |      |      |      |      |
| 25 |      |      |      |      |      |
| 26 |      |      |      |      |      |
| 27 |      |      |      |      |      |

---
