# Supplementary material for: DNA methylation abnormalities of imprinted genes in congenital heart disease: a pilot study
Source: PubMed Central journal article supplement (PMC7789576; doi:10.1186/s12920-020-00848-0), 2021-01-06
Supplement: 12920_2020_848_MOESM21_ESM.pdf [file 12920_2020_848_MOESM21_ESM.pdf]

Table S12.1 CpG sites methylation level of GNAS in CHD patients and healthy individuals

| Groups  | SampleID | CpG_1 | CpG_2 | CpG_3 | CpG_4.5.6 | CpG_7 | CpG_8 | CpG_9.10 |
|---------|----------|-------|-------|-------|-----------|-------|-------|----------|
|         | 1        |       |       |       |           |       |       |          |
|         | 2        |       |       |       |           |       |       |          |
|         | 3        | 0.45  | 0.2   | 0.38  | 0.51      | 0.98  | 0.43  | 0.4      |
|         | 4        | 0.39  | 0.19  | 0.48  | 0.64      | 0.79  | 0.45  | 0.59     |
|         | 5        |       |       |       |           |       |       |          |
|         | 6        | 0.49  | 0.2   | 0.44  | 0.54      | 0.63  | 0.45  | 0.39     |
|         | 7        | 0.39  | 0.24  | 0.46  | 0.54 NA   |       | 0.47  | 0.34     |
|         | 8        | 0.38  | 0.21  | 0.47  | 0.57      | 1     | 0.48  | 0.47     |
|         | 9        | 0.44  | 0.24  | 0.42  | 0.53 NA   |       | 0.42  | 0.32     |
|         | 10       | 0.39  | 0.3   | 0.39  | 0.55      | 0.71  | 0.44  | 0.43     |
|         | 11       |       |       |       |           |       |       |          |
|         | 12       | 0.48  | 0.31  | 0.51  | 0.58      | 0.51  | 0.45  | 0.47     |
|         | 13       | 0.4   | 0.18  | 0.33  | 0.49      | 0.69  | 0.48  | 0.32     |
| Control | 14       | 0.4   | 0.23  | 0.53  | 0.52      | 0.39  | 0.38  | 0.35     |
|         | 15       | 0.41  | 0.49  | 0.38  | 0.54 NA   |       | 0.43  | 0.43     |
|         | 16       | 0.44  | 0.3   | 0.45  | 0.61      | 0.65  | 0.48  | 0.47     |
|         | 17       | 0.39  | 0.34  | 0.4   | 0.56      | 0.46  | 0.37  | 0.35     |
|         | 18       | 0.47  | 0.23  | 0.46  | 0.53      | 0.13  | 0.38  | 0.29     |
|         | 19       | 0.5   | 0.25  | 0.54  | 0.63      | 0.6   | 0.52  | 0.52     |
|         | 20       |       |       |       |           |       |       |          |
|         | 21       | 0.38  | 0.21  | 0.44  | 0.46      | 0.63  | 0.45  | 0.37     |
|         | 22       | 0.47  | 0.18  | 0.49  | 0.54      | 0.4   | 0.45  | 0.4      |
|         | 23       | 0.48  | 0.19  | 0.56  | 0.54      | 1     | 0.45  | 0.47     |
|         | 24       | 0.51  | 0.12  | 0.59  | 0.65      | 0.31  | 0.58  | 0.56     |
|         | 25       | 0.48  | 0.16  | 0.37  | 0.53      | 0.42  | 0.45  | 0.31     |
|         | 26       | 0.45  | 0.23  | 0.45  | 0.59      | 0.45  | 0.44  | 0.43     |
|         | 27       | 0.46  | 0.11  | 0.56  | 0.59      | 1     | 0.35  | 0.36     |
|         | 28       | 0.45  | 0.18  | 0.46  | 0.58      | 0.5   | 0.38  | 0.43     |
|         | 1        | 0.4   | 0.25  | 0.44  | 0.51      | 0.47  | 0.36  | 0.31     |
|         | 2        |       |       |       |           |       |       |          |
|         | 3        | 0.46  | 0.3   | 0.48  | 0.58 NA   |       | 0.47  | 0.46     |
|         | 4        | 0.43  | 0.2   | 0.42  | 0.52      | 0.39  | 0.45  | 0.32     |
|         | 5        | 0.44  | 0.22  | 0.45  | 0.52      | 0.45  | 0.43  | 0.36     |
|         | 6        | 0.4   | 0.16  | 0.34  | 0.49      | 0     | 0.34  | 0.33     |
|         | 7        | 0.5   | 0.24  | 0.47  | 0.58      | 0.31  | 0.47  | 0.47     |
|         | 8        | 0.41  | 0.27  | 0.38  | 0.54      | 0.45  | 0.39  | 0.34     |
|         | 9        | 0.44  | 0.24  | 0.43  | 0.54      | 0.57  | 0.44  | 0.32     |
|         | 10       | 0.53  | 0.22  | 0.52  | 0.5       | 1     | 0.46  | 0.45     |
|         | 11       | 0.46  | 0.2   | 0.48  | 0.56      | 0.53  | 0.42  | 0.4      |
|         | 12       | 0.46  | 0.22  | 0.42  | 0.58      | 0.47  | 0.44  | 0.38     |
|         | 13       | 0.41  | 0.28  | 0.49  | 0.58      | 0.37  | 0.57  | 0.42     |
| CHD     | 14       |       |       |       |           |       |       |          |
|         | 15       | 0.44  | 0.21  | 0.47  | 0.54      | 0.42  | 0.46  | 0.39     |
|         | 16       | 0.52  | 0.26  | 0.57  | 0.64      | 0.56  | 0.59  | 0.55     |
|         | 17       | 0.46  | 0.1   | 0.5   | 0.44      | 0.86  | 0.41  | 0.37     |
|         | 18       | 0.43  | 0.35  | 0.47  | 0.55      | 0.71  | 0.39  | 0.35     |

|       |      |      |      |      |      |      |      |
|-------|------|------|------|------|------|------|------|
| 19    | 0.5  | 0.22 | 0.49 | 0.59 | 0.57 | 0.42 | 0.42 |
| 20    | 0.33 | 0.16 | 0.4  | 0.55 | 0.55 | 0.39 | 0.38 |
| 21 NA |      | 0.07 | 0.52 | 0.57 | 0.53 | 0.4  | 0.44 |
| 22    | 0.55 | 0.2  | 0.82 | 0.66 | 1    | 0.41 | 0.5  |
| 23    | 0.5  | 0.1  | 0.49 | 0.62 | 0.99 | 0.48 | 0.41 |
| 24    | 0.46 | 0.11 | 0.44 | 0.51 | 0.57 | 0.28 | 0.4  |
| 25    | 0.45 | 0.16 | 0.49 | 0.6  | 0.54 | 0.43 | 0.42 |
| 26    |      |      |      |      |      |      |      |
| 27    | 0.41 | 0.23 | 0.37 | 0.51 | 0.41 | 0.39 | 0.29 |

---

Table S12.2 CpG sites methylation level of GNAS in CHD patients and healthy individuals

| Groups  | SampleID | CpG_11.12 | CpG_13 | CpG_14 | CpG_15 | CpG_16.17 | CpG_18 | CpG_19 |
|---------|----------|-----------|--------|--------|--------|-----------|--------|--------|
|         | 1        |           |        |        |        |           |        |        |
|         | 2        |           |        |        |        |           |        |        |
|         | 3        | 0.33      | 0.2    | 0.21   | 0.4    | 0.31      | 0.43   | 0.48   |
|         | 4        | 0.41      | 0.19   | 0.32   | 0.53   | 0.43      | 0.45   | 0.57   |
|         | 5        |           |        |        |        |           |        |        |
|         | 6        | 0.47      | 0.2    | 0.25   | 0.49   | 0.29      | 0.45   | 0.59   |
|         | 7        | 0.49      | 0.24   | 0.25   | 0.45   | 0.33      | 0.47   | 0.48   |
|         | 8        | 0.43      | 0.21   | 0.21   | 0.37   | 0.39      | 0.48   | 0.45   |
|         | 9        | 0.41      | 0.24   | 0.26   | 0.39   | 0.26      | 0.42   | 0.46   |
|         | 10       | 0.36      | 0.3    | 0.3    | 0.55   | 0.49      | 0.44   | 0.44   |
|         | 11       |           |        |        |        |           |        |        |
|         | 12       | 0.45      | 0.31   | 0.28   | 0.46   | 0.39      | 0.45   | 0.51   |
|         | 13       | 0.4       | 0.18   | 0.21   | 0.45   | 0.12      | 0.48   | 0.42   |
| Control | 14       | 0.49      | 0.23   | 0.22   | 0.46   | 0.25      | 0.38   | 0.49   |
|         | 15       | 0.37      | 0.49   | 0.26   | 0.45   | 0.3       | 0.43   | 0.48   |
|         | 16       | 0.46      | 0.3    | 0.3    | 0.45   | 0.46      | 0.48   | 0.5    |
|         | 17       | 0.34      | 0.34   | 0.26   | 0.43   | 0.49      | 0.37   | 0.45   |
|         | 18       | 0.45      | 0.23   | 0.3    | 0.46   | 0.46      | 0.38   | 0.47   |
|         | 19       | 0.55      | 0.25   | 0.33   | 0.53   | 0.53      | 0.52   | 0.58   |
|         | 20       |           |        |        |        |           |        |        |
|         | 21       | 0.39      | 0.21   | 0.24   | 0.45   | 0.36      | 0.45   | 0.51   |
|         | 22       | 0.43      | 0.18   | 0.26   | 0.45   | 0.38      | 0.45   | 0.47   |
|         | 23       | 0.47      | 0.19   | 0.28   | 0.49   | 0.46      | 0.45   | 0.5    |
|         | 24       | 0.49      | 0.12   | 0.32   | 0.61   | 0.49      | 0.58   | 0.65   |
|         | 25       | 0.44      | 0.16   | 0.23   | 0.44   | 0.36      | 0.45   | 0.5    |
|         | 26       | 0.45      | 0.23   | 0.28   | 0.47   | 0.49      | 0.44   | 0.53   |
|         | 27       | 0.39      | 0.11   | 0.29   | 0.45   | 0.36      | 0.35   | 0.49   |
|         | 28       | 0.4       | 0.18   | 0.27   | 0.41   | 0.49      | 0.38   | 0.46   |
|         | 1        | 0.29      | 0.25   | 0.26   | 0.42   | 0.38      | 0.36   | 0.45   |
|         | 2        |           |        |        |        |           |        |        |
|         | 3        | 0.45      | 0.3    | 0.32   | 0.5    | 0.43      | 0.47   | 0.5    |
|         | 4        | 0.44      | 0.2    | 0.24   | 0.47   | 0.29      | 0.45   | 0.5    |
|         | 5        | 0.33      | 0.22   | 0.24   | 0.4    | 0.22      | 0.43   | 0.46   |
|         | 6        | 0.3       | 0.16   | 0.19   | 0.36   | 0.22      | 0.34   | 0.39   |
|         | 7        | 0.44      | 0.24   | 0.27   | 0.47   | 0.47      | 0.47   | 0.55   |
|         | 8        | 0.28      | 0.27   | 0.26   | 0.42   | 0.38      | 0.39   | 0.43   |
|         | 9        | 0.42      | 0.24   | 0.25   | 0.43   | 0.39      | 0.44   | 0.48   |
|         | 10       | 0.51      | 0.22   | 0.31   | 0.49   | 0.42      | 0.46   | 0.54   |
|         | 11       | 0.45      | 0.2    | 0.28   | 0.46   | 0.3       | 0.42   | 0.49   |
|         | 12       | 0.45      | 0.22   | 0.31   | 0.44   | 0.36      | 0.44   | 0.47   |
|         | 13       | 0.43      | 0.28   | 0.27   | 0.46   | 0.41      | 0.57   | 0.52   |
| CHD     | 14       |           |        |        |        |           |        |        |
|         | 15       | 0.45      | 0.21   | 0.25   | 0.47   | 0.33      | 0.46   | 0.5    |
|         | 16       | 0.55      | 0.26   | 0.35   | 0.58   | 0.63      | 0.59   | 0.64   |
|         | 17       | 0.39      | 0.1    | 0.28   | 0.45   | 0.1       | 0.41   | 0.48   |
|         | 18       | 0.44      | 0.35   | 0.36   | 0.48   | 0.49      | 0.39   | 0.52   |

|    |      |      |      |      |      |      |      |
|----|------|------|------|------|------|------|------|
| 19 | 0.51 | 0.22 | 0.31 | 0.5  | 0.41 | 0.42 | 0.53 |
| 20 | 0.44 | 0.16 | 0.23 | 0.4  | 0.39 | 0.39 | 0.41 |
| 21 | 0.38 | 0.07 | 0.3  | 0.44 | 0.41 | 0.4  | 0.51 |
| 22 | 0.72 | 0.2  | 0.61 | 0.7  | 0.78 | 0.41 | 0.72 |
| 23 | 0.43 | 0.1  | 0.3  | 0.5  | 0.44 | 0.48 | 0.5  |
| 24 | 0.41 | 0.11 | 0.26 | 0.39 | 0.29 | 0.28 | 0.5  |
| 25 | 0.45 | 0.16 | 0.28 | 0.45 | 0.4  | 0.43 | 0.51 |
| 26 |      |      |      |      |      |      |      |
| 27 | 0.39 | 0.23 | 0.21 | 0.38 | 0.24 | 0.39 | 0.43 |

---
