# Supplementary material for: DNA methylation abnormalities of imprinted genes in congenital heart disease: a pilot study
Source: PubMed Central journal article supplement (PMC7789576; doi:10.1186/s12920-020-00848-0), 2021-01-06
Supplement: 12920_2020_848_MOESM22_ESM.pdf [file 12920_2020_848_MOESM22_ESM.pdf]

Table S13.1 CpG sites methylation level of PLAGL1 in CHD patients and healthy individuals

| Groups  | SampleID | CpG_1.2 | CpG_3.4.5 | CpG_6.7 | CpG_8 | CpG_9.10.11.12.13 | CpG_14 | CpG_15.16 |
|---------|----------|---------|-----------|---------|-------|-------------------|--------|-----------|
| Control | 1        | 0.38    | 0.36      | 0.42    | 0.36  | 0.56              | 0.31   | 0.16      |
|         | 2        |         |           |         |       |                   |        |           |
|         | 3        | 0.4     | 0.47      | 0.38    | 0.39  | 0.63              | 0.44   | 0.19      |
|         | 4        | 0.45    | 0.47      | 0.49    | 0.52  | 0.61              | 0.48   | 0.17      |
|         | 5        | 0.39    | 0.37      | 0.39    | 0.32  | 0.53              | 0.25   | 0.15      |
|         | 6        | 0.43    | 0.41      | 0.33    | 0.41  | 0.53              | 0.32   | 0.12      |
|         | 7        | 0.38    | 0.35      | 0.38    | 0.34  | 0.53              | 0.29   | 0.13      |
|         | 8        |         |           |         |       |                   |        |           |
|         | 9        | 0.36    | 0.34      | 0.39    | 0.37  | 0.55              | 0.31   | 0.14      |
|         | 10       | 0.33    | 0.32      | 0.37    | 0.37  | 0.53              | 0.27   | 0.15      |
|         | 11       | 0.41    | 0.42      | 0.38    | 0.39  | 0.58              | 0.28   | 0.14      |
|         | 12       | 0.36    | 0.41      | 0.4     | 0.39  | 0.56              | 0.34   | 0.13      |
|         | 13       | 0.42    | 0.41      | 0.39    | 0.2   | 0.62              | 0.48   | 0.15      |
|         | 14       | 0.4     | 0.41      | 0.44    | 0.45  | 0.59              | 0.4    | 0.15      |
|         | 15       | 0.39    | 0.35      | 0.39    | 0.36  | 0.57              | 0.32   | 0.16      |
|         | 16       | 0.42    | 0.43      | 0.45    | 0.38  | 0.59              | 0.31   | 0.18      |
|         | 17       | 0.3     | 0.34      | 0.34    | 0.36  | 0.53              | 0.3    | 0.11      |
|         | 18       | 0.32    | 0.36      | 0.4     | 0.41  | 0.5               | 0.27   | 0.12      |
|         | 19       | 0.33    | 0.34      | 0.38    | 0.35  | 0.5               | 0.29   | 0.12      |
|         | 20       |         |           |         |       |                   |        |           |
|         | 21       | 0.47    | 0.46      | 0.48    | 0.5   | 0.64              | 0.4    | 0.19      |
|         | 22       | 0.32    | 0.39      | 0.36    | 0.45  | 0.58              | 0.31   | 0.13      |
|         | 23       | 0.36    | 0.39      | 0.4     | 0.46  | 0.59              | 0.36   | 0.18      |
|         | 24       | 0.42    | 0.43      | 0.45    | 0.39  | 0.54              | 0.4    | 0.18      |
|         | 25       | 0.33    | 0.38      | 0.37    | 0.38  | 0.59              | 0.3    | 0.14      |
|         | 26       | 0.35    | 0.3       | 0.38    | 0.26  | 0.57              | 0.24   | 0.15      |
|         | 27       | 0.39    | 0.41      | 0.43    | 0.43  | 0.6               | 0.42   | 0.15      |
|         | 28       | 0.27    | 0.3       | 0.34    | 0.41  | 0.48              | 0.26   | 0.11      |
| CHD     | 1        | 0.34    | 0.35      | 0.4     | 0.36  | 0.57              | 0.26   | 0.15      |
|         | 2        | 0.32    | 0.31      | 0.41    | 0.45  | 0.49              | 0.33   | 0.14      |
|         | 3        | 0.41    | 0.38      | 0.38    | 0.37  | 0.6               | 0.32   | 0.13      |
|         | 4        | 0.29    | 0.4       | 0.36    | 0.4   | 0.5               | 0.21   | 0.13      |
|         | 5        | 0.31    | 0.34      | 0.36    | 0.4   | 0.52              | 0.3    | 0.13      |
|         | 6        | 0.29    | 0.47      | 0.39    | 0.43  | 0.52              | 0.32   | 0.14      |
|         | 7        | 0.33    | 0.35      | 0.35    | 0.42  | 0.53              | 0.28   | 0.12      |
|         | 8        | 0.3     | 0.34      | 0.29    | 0.33  | 0.5               | 0.22   | 0.13      |
|         | 9        |         |           |         |       |                   |        |           |
|         | 10       | 0.29    | 0.32      | 0.41    | 0.38  | 0.5               | 0.27   | 0.14      |
|         | 11       | 0.32    | 0.32      | 0.4     | 0.33  | 0.51              | 0.26   | 0.14      |
|         | 12       | 0.3     | 0.33      | 0.39    | 0.42  | 0.49              | 0.3    | 0.14      |
|         | 13       | 0.37    | 0.39      | 0.41    | 0.41  | 0.59              | 0.31   | 0.15      |
|         | 14       | 0.24    | 0.26      | 0.31    | 0.21  | 0.46              | 0.22   | 0.11      |
|         | 15       | 0.34    | 0.38      | 0.39    | 0.4   | 0.51              | 0.31   | 0.14      |
|         | 16       | 0.31    | 0.34      | 0.39    | 0.36  | 0.5               | 0.29   | 0.14      |
|         | 17       | 0.37    | 0.32      | 0.45    | 0.35  | 0.55              | 0.31   | 0.14      |

|    |      |      |      |      |      |      |      |
|----|------|------|------|------|------|------|------|
| 18 | 0.22 | 0.26 | 0.31 | 0.31 | 0.42 | 0.23 | 0.1  |
| 19 | 0.4  | 0.43 | 0.47 | 0.41 | 0.62 | 0.36 | 0.17 |
| 20 | 0.35 | 0.38 | 0.45 | 0.44 | 0.54 | 0.26 | 0.17 |
| 21 | 0.4  | 0.36 | 0.45 | 0.39 | 0.5  | 0.31 | 0.16 |
| 22 | 0.35 | 0.27 | 0.44 | 0.4  | 0.51 | 0.26 | 0.16 |
| 23 | 0.37 | 0.43 | 0.41 | 0.39 | 0.62 | 0.3  | 0.14 |
| 24 | 0.43 | 0.46 | 0.55 | 0.47 | 0.6  | 0.15 | 0.2  |
| 25 | 0.31 | 0.38 | 0.42 | 0.39 | 0.49 | 0.28 | 0.17 |
| 26 | 0.26 | 0.33 | 0.34 | 0.44 | 0.52 | 0.27 | 0.1  |
| 27 | 0.31 | 0.32 | 0.37 | 0.35 | 0.54 | 0.29 | 0.14 |

---

Table S13.2 CpG sites methylation level of PLAGL1 in CHD patients and healthy individuals

| Groups  | SampleID | CpG_17.18.19 | CpG_20 | CpG_21 | CpG_22.23.24 | CpG_25 | CpG_26 | CpG_27 |
|---------|----------|--------------|--------|--------|--------------|--------|--------|--------|
| Control | 1        | 0.37         | 0.26   | 0.36   | 0.35         | 0.47   | 0.47   | 0.53   |
|         | 2        |              |        |        |              |        |        |        |
|         | 3        | 0.47         | 0.45   | 0.39   | 0.34         | 0.47   | 0.56   | 0.53   |
|         | 4        | 0.43         | 0.39   | 0.52   | 0.43         | 0.51   | 0.73   | 0.58   |
|         | 5        | 0.31         | 0.19   | 0.32   | 0.65         | 0.41   | 0.56   | 0.56   |
|         | 6        | 0.48         | 0.28   | 0.41   | 0.37         | 0.47   | 0.71   | 0.61   |
|         | 7        | 0.36         | 0.17   | 0.34   | 0.31         | 0.44   | 0.57   | 0.57   |
|         | 8        |              |        |        |              |        |        |        |
|         | 9        | 0.37         | 0.27   | 0.37   | 0.32         | 0.45   | 0.5    | 0.59   |
|         | 10       | 0.35         | 0.38   | 0.37   | 0.35         | 0.47   | 0.49   | 0.58   |
|         | 11       | 0.4          | 0.16   | 0.39   | 0.28         | 0.42   | 0.65   | 0.58   |
|         | 12       | 0.35         | 0.39   | 0.39   | 0.32         | 0.47   | 0.69   | 0.57   |
|         | 13       | 0.39         | 0.21   | 0.2    | 0.35         | 0.5    | 0.57   | 0.56   |
|         | 14       | 0.51         | 0.32   | 0.45   | 0.71         | 0.44   | 0.57   | 0.57   |
|         | 15       | 0.41         | 0.23   | 0.36   | 0.1          | 0.46   | 0.67   | 0.58   |
|         | 16       | 0.49         | 0.32   | 0.38   | 0.49         | 0.53   | 0.64   | 0.57   |
|         | 17       | 0.31         | 0.29   | 0.36   | 0.27         | 0.42   | 0.54   | 0.57   |
|         | 18       | 0.35         | 0.39   | 0.41   | 0.39         | 0.47   | 0.36   | 0.56   |
|         | 19       | 0.32         | 0.21   | 0.35   | 0.3          | 0.42   | 0.52   | 0.58   |
|         | 20       |              |        |        |              |        |        |        |
|         | 21       | 0.42         | 0.42   | 0.5    | 0.37         | 0.53   | 0.55   | 0.58   |
|         | 22       | 0.32         | 0.28   | 0.45   | 0.31         | 0.43   | 0.55   | 0.56   |
|         | 23       | 0.43         | 0.32   | 0.46   | 0.44         | 0.46   | 0.65   | 0.61   |
|         | 24       | 0.49         | 0.22   | 0.39   | 0.39         | 0.55   | 0.59   | 0.58   |
|         | 25       | 0.38         | 0.2    | 0.38   | 0.36         | 0.44   | 0.56   | 0.55   |
|         | 26       | 0.37         | 0.15   | 0.26   | 0.37         | 0.47   | 0.66   | 0.55   |
|         | 27       | 0.44         | 0.31   | 0.43   | 0.38         | 0.49   | 0.73   | 0.64   |
|         | 28       | 0.31         | 0.29   | 0.41   | 0.36         | 0.41   | 0.55   | 0.56   |
| CHD     | 1        | 0.32         | 0.31   | 0.36   | 0.3          | 0.47   | 0.53   | 0.52   |
|         | 2        | 0.37         | 0.36   | 0.45   | 0.36         | 0.48   | 0.47   | 0.5    |
|         | 3        | 0.39         | 0.23   | 0.37   | 0.35         | 0.41   | 0.52   | 0.55   |
|         | 4        | 0.36         | 0.3    | 0.4    | 0.41         | 0.45   | 0.53   | 0.49   |
|         | 5        | 0.31         | 0.37   | 0.4    | 0.3          | 0.46   | 0.51   | 0.5    |
|         | 6        | 0.37         | 0.37   | 0.43   | 0.36         | 0.49   | 0.37   | 0.53   |
|         | 7        | 0.33         | 0.32   | 0.42   | 0.33         | 0.45   | 0.64   | 0.56   |
|         | 8        | 0.31         | 0.25   | 0.33   | 0.32         | 0.42   | 0.56   | 0.51   |
|         | 9        |              |        |        |              |        |        |        |
|         | 10       | 0.36         | 0.35   | 0.38   | 0.38         | 0.51   | 0.63   | 0.52   |
|         | 11       | 0.31         | 0.19   | 0.33   | 0.28         | 0.43   | 0.56   | 0.52   |
|         | 12       | 0.41         | 0.35   | 0.42   | 0.43         | 0.45   | 0.48   | 0.51   |
|         | 13       | 0.38         | 0.31   | 0.41   | 0.38         | 0.45   | 0.66   | 0.52   |
|         | 14       | 0.3          | 0.26   | 0.21   | 0.4          | 0.47   | 0.61   | 0.65   |
|         | 15       | 0.38         | 0.29   | 0.4    | 0.36         | 0.42   | 0.72   | 0.53   |
|         | 16       | 0.33         | 0.3    | 0.36   | 0.31         | 0.45   | 0.55   | 0.55   |
|         | 17       | 0.4          | 0.31   | 0.35   | 0.41         | 0.45   | 0.49   | 0.51   |

|    |      |      |      |      |      |      |      |
|----|------|------|------|------|------|------|------|
| 18 | 0.24 | 0.21 | 0.31 | 0.27 | 0.42 | 0.42 | 0.49 |
| 19 | 0.4  | 0.39 | 0.41 | 0.33 | 0.46 | 0.48 | 0.5  |
| 20 | 0.44 | 0.37 | 0.44 | 0.48 | 0.53 | 0.45 | 0.52 |
| 21 | 0.33 | 0.23 | 0.39 | 0.37 | 0.49 | 0.65 | 0.59 |
| 22 | 0.42 | 0.33 | 0.4  | 0.43 | 0.55 | 0.22 | 0.55 |
| 23 | 0.38 | 0.3  | 0.39 | 0.39 | 0.42 | 0.69 | 0.52 |
| 24 | 0.51 | 0.25 | 0.47 | 0.48 | 0.57 | 0.62 | 0.52 |
| 25 | 0.41 | 0.36 | 0.39 | 0.48 | 0.48 | 0.44 | 0.54 |
| 26 | 0.34 | 0.29 | 0.44 | 0.37 | 0.37 | 0.55 | 0.47 |
| 27 | 0.33 | 0.23 | 0.35 | 0.3  | 0.4  | 0.54 | 0.51 |

---

Table S13.3 CpG sites methylation level of PLAGL1 in CHD patients and healthy individuals

| Groups  | SampleID | CpG_28 | CpG_29 | CpG_30.31 |      |
|---------|----------|--------|--------|-----------|------|
| Control | 1        | 0.65   | 0.51   | 0.42      |      |
|         | 2        |        |        |           |      |
|         | 3        | 0.68   | 0.48   | 0.44      |      |
|         | 4        | 0.68   | 0.47   | 0.51      |      |
|         | 5        | 0.63   | 0.5    | 0.41      |      |
|         | 6        | 0.68   | 0.55   | 0.44      |      |
|         | 7        | 0.69   | 0.48   | 0.45      |      |
|         | 8        |        |        |           |      |
|         | 9        | 0.69   | 0.48   | 0.45      |      |
|         | 10       | 0.71   | 0.54   | 0.51      |      |
|         | 11       | 0.65   | 0.56   | 0.38      |      |
|         | 12       | 0.69   | 0.54   | 0.47      |      |
|         | 13       | 0.67   | 0.44   | 0.46      |      |
|         | 14       | 0.66   | 0.52   | 0.41      |      |
|         | 15       | 0.68   | 0.47   | 0.46      |      |
|         | 16       | 0.66   | 0.49   | 0.46      |      |
|         | 17       | 0.76   | 0.58   | 0.49      |      |
|         | 18       | 0.72   | 0.58   | 0.42      |      |
|         | 19       | 0.69   | 0.47   | 0.46      |      |
|         | 20       |        |        |           |      |
|         | 21       | 0.33   | 0.52   | 0.47      |      |
|         | 22       | 0.64   | 0.52   | 0.43      |      |
|         | 23       | 0.74   | 0.48   | 0.52      |      |
|         | 24       | 0.67   | 0.52   | 0.42      |      |
|         | 25       | 0.67   | 0.43   | 0.47      |      |
|         | 26       | 0.65   | 0.5    | 0.47      |      |
|         | 27       | 0.73   | 0.47   | 0.57      |      |
|         | 28       | 0.66   | 0.48   | 0.46      |      |
|         | CHD      | 1      | 0.65   | 0.54      | 0.47 |
|         |          | 2      | 0.67   | 0.52      | 0.43 |
| 3       |          | 0.62   | 0.58   | 0.48      |      |
| 4       |          | 0.66   | 0.5    | 0.45      |      |
| 5       |          | 0.62   | 0.48   | 0.41      |      |
| 6       |          | 0.68   | 0.49   | 0.46      |      |
| 7       |          | 0.67   | 0.57   | 0.46      |      |
| 8       |          | 0.71   | 0.6    | 0.47      |      |
| 9       |          |        |        |           |      |
| 10      |          | 0.65   | 0.55   | 0.42      |      |
| 11      |          | 0.61   | 0.5    | 0.43      |      |
| 12      |          | 0.64   | 0.53   | 0.4       |      |
| 13      |          | 0.63   | 0.51   | 0.47      |      |
| 14      |          | 0.76   | 0.65   | 0.56      |      |
| 15      |          | 0.65   | 0.52   | 0.51      |      |
| 16      |          | 0.67   | 0.56   | 0.51      |      |
| 17      |          | 0.6    | 0.46   | 0.39      |      |

|    |      |      |      |
|----|------|------|------|
| 18 | 0.61 | 0.49 | 0.44 |
| 19 | 0.61 | 0.44 | 0.43 |
| 20 | 0.6  | 0.43 | 0.39 |
| 21 | 0.66 | 0.54 | 0.49 |
| 22 | 0.7  | 0.6  | 0.5  |
| 23 | 0.62 | 0.49 | 0.5  |
| 24 | 0.71 | 0.45 | 0.4  |
| 25 | 0.64 | 0.48 | 0.38 |
| 26 | 0.63 | 0.51 | 0.39 |
| 27 | 0.62 | 0.49 | 0.46 |

---
