# Supplementary material for: DNA methylation abnormalities of imprinted genes in congenital heart disease: a pilot study
Source: PubMed Central journal article supplement (PMC7789576; doi:10.1186/s12920-020-00848-0), 2021-01-06
Supplement: 12920_2020_848_MOESM23_ESM.pdf [file 12920_2020_848_MOESM23_ESM.pdf]

Table S14.1 CpG sites methylation level of MEST in CHD patients and healthy individuals

| Groups  | SampleID | CpG_1 | CpG_2.3 | CpG_4 | CpG_5.6 | CpG_7 | CpG_8 | CpG_9.10 |
|---------|----------|-------|---------|-------|---------|-------|-------|----------|
| Control | 1        |       |         |       |         |       |       |          |
|         | 2        | 0.54  | 0.5     | 0.56  | 0.56    | 0.58  | 0.58  | 0.42     |
|         | 3        | 0.56  | 0.49    | 0.59  | 0.57    | 0.59  | 0.55  | 0.49     |
|         | 4        | 0.55  | 0.48    | 0.57  | 0.56    | 0.72  | 0.58  | 0.52     |
|         | 5        | 0.54  | 0.49    | 0.56  | 0.58    | 0.64  | 0.62  | 0.52     |
|         | 6        | 0.53  | 0.4     | 0.53  | 0.49    | 0.64  | 0.53  | 0.45     |
|         | 7        |       |         |       |         |       |       |          |
|         | 8        | 0.55  | 0.46    | 0.57  | 0.56    | 0.65  | 0.62  | 0.48     |
|         | 9        | 0.53  | 0.51    | 0.56  | 0.55    | 0.63  | 0.63  | 0.46     |
|         | 10       | 0.52  | 0.49    | 0.55  | 0.54    | 0.57  | 0.59  | 0.46     |
|         | 11       |       |         |       |         |       |       |          |
|         | 12       | 0.59  | 0.55    | 0.6   | 0.61    | 0.74  | 0.71  | 0.52     |
|         | 13       | 0.57  | 0.47    | 0.57  | 0.55    | 0.64  | 0.63  | 0.51     |
|         | 14       | 0.55  | 0.52    | 0.55  | 0.55    | 0.7   | 0.67  | 0.49     |
|         | 15       | 0.5   | 0.41    | 0.53  | 0.49    | 0.69  | 0.52  | 0        |
|         | 16       | 0.54  | 0.46    | 0.56  | 0.55    | 0.62  | 0.56  | 0.53     |
|         | 17       | 0.55  | 0.55    | 0.55  | 0.57    | 0.63  | 0.63  | 0.5      |
|         | 18       | 0.61  | 0.57    | 0.63  | 0.61    | 0.68  | 0.77  | 0.53     |
|         | 19       | 0.6   | 0.58    | 0.65  | 0.61    | 0.56  | 0.65  | 0.59     |
|         | 20       |       |         |       |         |       |       |          |
|         | 21       | 0.62  | 0.6     | 0.67  | 0.62    | 0.7   | 0.78  | 0.64     |
|         | 22       | 0.55  | 0.62    | 0.58  | 0.58    | 0.65  | 0.7   | 0.53     |
|         | 23       | 0.6   | 0.63    | 0.66  | 0.61    | 0.64  | 0.74  | 0.49     |
|         | 24       | 0.56  | 0.5     | 0.57  | 0.54    | 0.68  | 0.57  | 0.51     |
|         | 25       | 0.53  | 0.54    | 0.56  | 0.58    | 0.67  | 0.82  | 0.4      |
|         | 26       | 0.6   | 0.56    | 0.63  | 0.61    | 0.77  | 0.58  | 0.54     |
|         | 27       |       |         |       |         |       |       |          |
|         | 28       |       |         |       |         |       |       |          |
| CHD     | 1        | 0.49  | 0.5     | 0.53  | 0.52    | 0.6   | 0.71  | 0.59     |
|         | 2        | 0.59  | 0.53    | 0.65  | 0.6     | 0.66  | 0.58  | 0.57     |
|         | 3        |       |         |       |         |       |       |          |
|         | 4        | 0.54  | 0.47    | 0.56  | 0.56    | 0.67  | 0.72  | 0.52     |
|         | 5        | 0.6   | 0.52    | 0.59  | 0.59    | 0.6   | 0.69  | 0.56     |
|         | 6        | 0.63  | 0.65    | 0.66  | 0.63    | 0.79  | 0.76  | 0.49     |
|         | 7        | 0.51  | 0.46    | 0.57  | 0.53    | 0.65  | 0.6   | 0.6      |
|         | 8        | 0.58  | 0.45    | 0.53  | 0.53    | 0.7   | 0.75  | 0.5      |
|         | 9        | 0.47  | 0.44    | 0.47  | 0.47    | 0.51  | 0.48  | 0.48     |
|         | 10       | 0.45  | 0.42    | 0.5   | 0.49    | 0.6   | 0.58  | 0.57     |
|         | 11       | 0.53  | 0.48    | 0.58  | 0.56    | 0.63  | 0.55  | 0.54     |
|         | 12       | 0.5   | 0.44    | 0.51  | 0.52    | 0.6   | 0.69  | 0.61     |
|         | 13       | 0.54  | 0.5     | 0.57  | 0.52    | 0.67  | 0.56  | 0.54     |
|         | 14       |       |         |       |         |       |       |          |
|         | 15       |       |         |       |         |       |       |          |
|         | 16       |       |         |       |         |       |       |          |

|    |      |      |      |      |      |      |      |
|----|------|------|------|------|------|------|------|
| 17 |      |      |      |      |      |      |      |
| 18 | 0.54 | 0.5  | 0.5  | 0.54 | 0.66 | 0.68 | 0.65 |
| 19 | 0.57 | 0.55 | 0.58 | 0.57 | 0.62 | 0.76 | 0.56 |
| 20 | 0.53 | 0.48 | 0.57 | 0.54 | 0.55 | 0.61 | 0.58 |
| 21 | 0.68 | 0.5  | 0.59 | 0.53 | 0.56 | 0.66 | 0.8  |
| 22 |      |      |      |      |      |      |      |
| 23 | 0.48 | 0.36 | 0.48 | 0.41 | 0.59 | 0.52 | 0.57 |
| 24 | 0.56 | 0.52 | 0.61 | 0.6  | 0.66 | 0.54 | 0.51 |
| 25 | 0.44 | 0.43 | 0.48 | 0.5  | 0.53 | 0.47 | 0.55 |
| 26 | 0.75 | 0.73 | 0.77 | 0.73 | 0.85 | 0.9  | 0.48 |
| 27 |      |      |      |      |      |      |      |

---

Table S14.2 CpG sites methylation level of MEST in CHD patients and healthy individuals

| Groups  | SampleID | CpG_11.12.13.14 | CpG_15.16 | CpG_17 | CpG_18 | CpG_19.20 | CpG_21.22 |
|---------|----------|-----------------|-----------|--------|--------|-----------|-----------|
| Control | 1        |                 |           |        |        |           |           |
|         | 2        | 0.07            | 0.4       | 0.41   | 0.46   | 0.44      | 0.42      |
|         | 3        | 0.42            | 0.46      | 0.46   | 0.51   | 0.48      | 0.48      |
|         | 4        | 0.46            | 0.51      | 0.5    | 0.54   | 0.52      | 0.53      |
|         | 5        | 0.41            | 0.51      | 0.47   | 0.47   | 0.46      | 0.46      |
|         | 6        | 0.42            | 0.46      | 0.47   | 0.51   | 0.49      | 0.5       |
|         | 7        |                 |           |        |        |           |           |
|         | 8        | 0.45            | 0.48      | 0.48   | 0.51   | 0.46      | 0.5       |
|         | 9        | 0.38            | 0.42      | 0.41   | 0.4    | 0.4       | 0.46      |
|         | 10       | 0.37            | 0.44      | 0.46   | 0.48   | 0.47      | 0.46      |
|         | 11       |                 |           |        |        |           |           |
|         | 12       | 0.45            | 0.5       | 0.54   | 0.52   | 0.51      | 0.5       |
|         | 13       | 0.47            | 0.74      | 0.47   | 0.52   | 0.51      | 0.52      |
|         | 14       | 0.46            | 0.81      | 0.5    | 0.52   | 0.51      | 0.55      |
|         | 15       | 0.09            | 0.52      | 0.55   | 0.55   | 0.44      | 0.48      |
|         | 16       | 0.46            | 0.51      | 0.49   | 0.51   | 0.51      | 0.51      |
|         | 17       | 0.44            | 0.49      | 0.45   | 0.49   | 0.48      | 0.5       |
|         | 18       | 0.47            | 0.61      | 0.57   | 0.57   | 0.56      | 0.55      |
|         | 19       | 0.97            | 0.57      | 0.53   | 0.56   | 0.58      | 0.56      |
|         | 20       |                 |           |        |        |           |           |
|         | 21       | 0.6             | 0.59      | 0.63   | 0.66   | 0.63      | 0.65      |
|         | 22       | 0.42            | 0.39      | 0.5    | 0.55   | 0.52      | 0.52      |
|         | 23       | 0.45            | 0.46      | 0.5    | 0.53   | 0.49      | 0.52      |
|         | 24       | 0.51            | 0.55      | 0.51   | 0.58   | 0.55      | 0.58      |
|         | 25       | 0.15            | 0.47      | 0.44   | 0.5    | 0.46      | 0.49      |
|         | 26       | 0.06            | 0.57      | 0.5    | 0.53   | 0.5       | 0.51      |
|         | 27       |                 |           |        |        |           |           |
| 28      |          |                 |           |        |        |           |           |
| CHD     | 1        | 0.9             | 0.65      | 0.55   | 0.54   | 0.53      | 0.66      |
|         | 2        | 0.96            | 0.44      | 0.56   | 0.55   | 0.54      | 0.57      |
|         | 3        |                 |           |        |        |           |           |
|         | 4        | 0.48            | 0.53      | 0.51   | 0.57   | 0.54      | 0.54      |
|         | 5        | 0.51            | 0.53      | 0.58   | 0.6    | 0.57      | 0.59      |
|         | 6        | 0.54            | 0.4       | 0.53   | 0.58   | 0.54      | 0.59      |
|         | 7        | 0.55            | 0.58      | 0.63   | 0.63   | 0.63      | 0.62      |
|         | 8        | 0.44            | 0.52      | 0.49   | 0.52   | 0.51      | 0.51      |
|         | 9        | 0.42            | 0.47      | 0.48   | 0.48   | 0.48      | 0.53      |
|         | 10       | 0.55            | 0.6       | 0.56   | 0.59   | 0.6       | 0.62      |
|         | 11       | 0.47            | 0.49      | 0.5    | 0.53   | 0.51      | 0.53      |
|         | 12       | 0.62            | 0.59      | 0.6    | 0.65   | 0.62      | 0.62      |
|         | 13       | 0.48            | 0.55      | 0.55   | 0.56   | 0.54      | 0.56      |
|         | 14       |                 |           |        |        |           |           |
|         | 15       |                 |           |        |        |           |           |
|         | 16       |                 |           |        |        |           |           |

|    |      |      |      |      |      |      |
|----|------|------|------|------|------|------|
| 17 |      |      |      |      |      |      |
| 18 | 0.62 | 0.65 | 0.63 | 0.62 | 0.65 | 0.69 |
| 19 | 0.48 | 0.48 | 0.55 | 0.55 | 0.53 | 0.57 |
| 20 | 0.52 | 0.46 | 0.57 | 0.57 | 0.59 | 0.57 |
| 21 | 0.8  | 0.8  | 0.75 | 0.67 | 0.82 | 0.82 |
| 22 |      |      |      |      |      |      |
| 23 | 0.47 | 0.5  | 0.52 | 0.57 | 0.58 | 0.58 |
| 24 | 0.43 | 0.46 | 0.5  | 0.55 | 0.55 | 0.61 |
| 25 | 0.48 | 0.52 | 0.52 | 0.51 | 0.55 | 0.57 |
| 26 | 0.41 | 0.34 | 0.42 | 0.39 | 0.45 | 0.43 |
| 27 |      |      |      |      |      |      |

---

Table S14.3 CpG sites methylation level of MEST in CHD patients and healthy individuals

| Groups  | SampleID | CpG_23.24.25.26 |
|---------|----------|-----------------|
| Control | 1        |                 |
|         | 2        | 0.44            |
|         | 3        | 0.46            |
|         | 4        | 0.51            |
|         | 5        | 0.44            |
|         | 6        | 0.49            |
|         | 7        |                 |
|         | 8        | 0.46            |
|         | 9        | 0.46            |
|         | 10       | 0.47            |
|         | 11       |                 |
|         | 12       | 0.51            |
|         | 13       | 0.51            |
|         | 14       | 0.53            |
|         | 15       | 0.37            |
|         | 16       | 0.51            |
|         | 17       | 0.53            |
|         | 18       | 0.55            |
|         | 19       | 0.55            |
|         | 20       |                 |
|         | 21       | 0.65            |
|         | 22       | 0.48            |
|         | 23       | 0.48            |
|         | 24       | 0.57            |
|         | 25       | 0.5             |
|         | 26       | 0.51            |
|         | 27       |                 |
|         | 28       |                 |
| CHD     | 1        | 0.56            |
|         | 2        | 0.54            |
|         | 3        |                 |
|         | 4        | 0.53            |
|         | 5        | 0.6             |
|         | 6        | 0.6             |
|         | 7        | 0.57            |
|         | 8        | 0.5             |
|         | 9        | 0.51            |
|         | 10       | 0.6             |
|         | 11       | 0.57            |
|         | 12       | 0.63            |
|         | 13       | 0.57            |
|         | 14       |                 |
|         | 15       |                 |
|         | 16       |                 |

|    |      |
|----|------|
| 17 |      |
| 18 | 0.73 |
| 19 | 0.58 |
| 20 | 0.59 |
| 21 | 0.79 |
| 22 |      |
| 23 | 0.61 |
| 24 | 0.48 |
| 25 | 0.57 |
| 26 | 0.39 |
| 27 |      |

---
