# Supplementary material for: DNA methylation abnormalities of imprinted genes in congenital heart disease: a pilot study
Source: PubMed Central journal article supplement (PMC7789576; doi:10.1186/s12920-020-00848-0), 2021-01-06
Supplement: 12920_2020_848_MOESM24_ESM.pdf [file 12920_2020_848_MOESM24_ESM.pdf]

Table S15.1 CpG sites methylation level of IGF2 in CHD patients and healthy individuals

| Groups  | SampleID | CpG_1 | CpG_2 | CpG_3 | CpG_4.5 | CpG_6 | CpG_7 | CpG_8 |
|---------|----------|-------|-------|-------|---------|-------|-------|-------|
| Control | 1        | 0.3   | 0.63  | 0.62  | 0.47    | 0.62  | 0.36  | 0.7   |
|         | 2        | 0.5   | 0.73  | 0.6   | 0.49    | 0.6   | 0.54  | 0.76  |
|         | 3        |       |       |       |         |       |       |       |
|         | 4        |       |       |       |         |       |       |       |
|         | 5        | 0.41  | 0.66  | 0.58  | 0.58    | 0.58  | 0.36  | 0.78  |
|         | 6        |       |       |       |         |       |       |       |
|         | 7        | 0.55  | 0.53  | 0.57  | 0.49    | 0.57  | 0.4   | 0.96  |
|         | 8        | 1     | 0.5   | 0.64  | 0.41    | 0.64  | 0.38  | 0.43  |
|         | 9        | 0.41  | 0.75  | 0.59  | 0.38    | 0.59  | 0.54  | 0.71  |
|         | 10       |       |       |       |         |       |       |       |
|         | 11       |       |       |       |         |       |       |       |
|         | 12       | 0.44  | 0.45  | 0.59  | 0.5     | 0.59  | 0.37  | 0.78  |
|         | 13       |       |       |       |         |       |       |       |
|         | 14       | 0.46  | 1     | 0.54  | 0.61    | 0.54  | 0.54  | 0.52  |
|         | 15       |       |       |       |         |       |       |       |
|         | 16       | 0.41  | 0.39  | 0.58  | 0.48    | 0.58  | 0.47  | 0.86  |
|         | 17       | 0.56  | 0.84  | 0.68  | 0.65    | 0.68  | 0.89  | 0.71  |
|         | 18       | 0.5   | 0.78  | 0.64  | 0.57    | 0.64  | 0.37  | 0.68  |
|         | 19       |       |       |       |         |       |       |       |
|         | 20       |       |       |       |         |       |       |       |
|         | 21       | 0.4   | 0.77  | 0.59  | 0.53    | 0.59  | 0.39  | 0.87  |
|         | 22       |       |       |       |         |       |       |       |
|         | 23       | 0.5   | 0.73  | 0.64  | 0.51    | 0.64  | 0.49  | 0.8   |
|         | 24       | 0.36  | 0.69  | 0.59  | 0.55    | 0.59  | 0.33  | 0.69  |
|         | 25       | 0.29  | 1     | 0.56  | 0.54    | 0.56  | 0.4   | 0.72  |
|         | 26       | 0.48  | 0.71  | 0.61  | 0.61    | 0.61  | 0.52  | 0.78  |
|         | 27       | 0.36  | 0.93  | 0.63  | 0.9     | 0.63  | 0.64  | 0.65  |
|         | 28       |       |       |       |         |       |       |       |
| CHD     | 1        | 0.6   | 0.76  | 0.66  | 0.58    | 0.66  | 0.53  | 0.77  |
|         | 2        | 0.49  | 0.73  | 0.61  | 0.58    | 0.61  | 0.45  | 0.66  |
|         | 3        |       |       |       |         |       |       |       |
|         | 4        | 0.51  | 0.75  | 0.6   | 0.6     | 0.6   | 0.47  | 0.75  |
|         | 5        | 0.52  | 0.74  | 0.63  | 0.55    | 0.63  | 0.46  | 0.77  |
|         | 6        | 0.41  | 0.7   | 0.59  | 0.68    | 0.59  | 0.38  | 0.71  |
|         | 7        | 0.3   | 0.68  | 0.56  | 0.44    | 0.56  | 0.38  | 0.66  |
|         | 8        | 0.28  | 0.58  | 0.53  | 0.62    | 0.53  | 0.34  | 0.43  |
|         | 9        | 0.65  | 0.87  | 0.66  | 0.63    | 0.66  | 0.69  | 0.84  |
|         | 10       |       |       |       |         |       |       |       |
|         | 11       |       |       |       |         |       |       |       |
|         | 12       | 0.43  | 0.73  | 0.65  | 0.54    | 0.65  | 0.45  | 0.71  |
|         | 13       | 0.49  | 0.63  | 0.6   | 0.52    | 0.6   | 0.98  | 0.69  |
|         | 14       | 0.34  | 0.82  | 0.57  | 0.49    | 0.57  | 0.36  | 0.69  |
|         | 15       | 0.49  | 0.76  | 0.64  | 0.53    | 0.64  | 0.45  | 0.74  |
|         | 16       | 0.43  | 0.7   | 0.55  | 0.52    | 0.55  | 0.41  | 0.74  |
|         | 17       | 0.27  | 0.63  | 0.54  | 0.55    | 0.54  | 0.24  | 0.54  |
|         | 18       | 0.39  | 0.86  | 0.58  | 0.49    | 0.58  | 0.39  | 0.75  |

|    |      |      |      |      |      |      |      |
|----|------|------|------|------|------|------|------|
| 19 | 0.51 | 0.9  | 0.68 | 0.62 | 0.68 | 0.59 | 0.77 |
| 20 |      |      |      |      |      |      |      |
| 21 |      |      |      |      |      |      |      |
| 22 |      |      |      |      |      |      |      |
| 23 | 0.41 | 0.83 | 0.67 | 0.49 | 0.67 | 0.43 | 0.63 |
| 24 |      |      |      |      |      |      |      |
| 25 | 0.12 | 0.66 | 0.78 | 1    | 0.78 | 0.12 | 0.12 |
| 26 |      |      |      |      |      |      |      |
| 27 | 0.51 | 0.72 | 0.59 | 0.58 | 0.59 | 0.46 | 0.72 |

---

Table S15.2 CpG sites methylation level of IGF2 in CHD patients and healthy individuals

| Groups  | SampleID | CpG_9.10.11 | CpG_12.13 | CpG_14 | CpG_15.16 | CpG_17 | CpG_18 | CpG_19 |
|---------|----------|-------------|-----------|--------|-----------|--------|--------|--------|
| Control | 1        | 0.55        | 0.83      | 0.69   | 0.64      | 0.8    | 0.68   | 0.43   |
|         | 2        | 0.46        | 0.53      | 0.48   | 0.49      | 0.62   | 0.61   | 0.46   |
|         | 3        |             |           |        |           |        |        |        |
|         | 4        |             |           |        |           |        |        |        |
|         | 5        | 0.63        | 0.54      | 0.77   | 0.72      | 0.83   | 0.73   | 0.53   |
|         | 6        |             |           |        |           |        |        |        |
|         | 7        | 0.47        | 0.52      | 0.47   | 0.62      | 0.67   | 0.58   | 0.55   |
|         | 8        | 0.43        | 0.56      | 0.47   | 0.52      | 0.7    | 0.62   | 0.58   |
|         | 9        | 0.64        | 0.7       | 0.69   | 0.6       | 0.82   | 0.69   | 0.41   |
|         | 10       |             |           |        |           |        |        |        |
|         | 11       |             |           |        |           |        |        |        |
|         | 12       | 0.48        | 0.61      | 0.53   | 0.63      | 0.72   | 0.7    | 0.33   |
|         | 13       |             |           |        |           |        |        |        |
|         | 14       | 0.45        | 0.61      | 0.6    | 0.59      | 0.74   | 0.69   | 0.44   |
|         | 15       |             |           |        |           |        |        |        |
|         | 16       | 0.51        | 0.53      | 0.61   | 0.58      | 0.71   | 0.68   | 1      |
|         | 17       | 0.46        | 0.52      | 0.51   | 0.63      | 0.74   | 0.7    | 0.42   |
|         | 18       | 0.54        | 0.6       | 0.61   | 0.63      | 0.77   | 0.71   | 0.42   |
|         | 19       |             |           |        |           |        |        |        |
|         | 20       |             |           |        |           |        |        |        |
|         | 21       | 0.48        | 0.59      | 0.58   | 0.63      | 0.77   | 0.72   | 0.55   |
|         | 22       |             |           |        |           |        |        |        |
|         | 23       | 0.44        | 0.47      | 0.47   | 0.53      | 0.62   | 0.62   | 0.38   |
|         | 24       | 0.53        | 0.71      | 0.58   | 0.67      | 0.74   | 0.73   | 0.46   |
|         | 25       | 0.41        | 0.5       | 0.41   | 0.59      | 0.56   | 0.61   | 0.4    |
|         | 26       | 0.44        | 0.46      | 0.37   | 0.56      | 0.52   | 0.57   | 0.43   |
|         | 27       | 0.52        | 0.56      | 0.57   | 0.65      | 0.74   | 0.69   | 0.48   |
|         | 28       |             |           |        |           |        |        |        |
| CHD     | 1        | 0.62        | 0.76      | 0.65   | 0.65      | 0.83   | 0.7    | 0.46   |
|         | 2        | 0.57        | 0.54      | 0.55   | 0.65      | 0.67   | 0.68   | 0.37   |
|         | 3        |             |           |        |           |        |        |        |
|         | 4        | 0.5         | 0.54      | 0.53   | 0.62      | 0.72   | 0.66   | 0.36   |
|         | 5        | 0.48        | 0.45      | 0.49   | 0.56      | 0.73   | 0.63   | 0.5    |
|         | 6        | 0.43        | 0.47      | 0.49   | 0.51      | 0.69   | 0.6    | 0.52   |
|         | 7        | 0.46        | 0.47      | 0.47   | 0.53      | 0.64   | 0.6    | 0.52   |
|         | 8        | 0.55        | 0.7       | 0.6    | 0.64      | 0.77   | 0.7    | 0.52   |
|         | 9        | 0.57        | 0.61      | 0.59   | 0.66      | 0.8    | 0.69   | 0.59   |
|         | 10       |             |           |        |           |        |        |        |
|         | 11       |             |           |        |           |        |        |        |
|         | 12       | 0.4         | 0.48      | 0.54   | 0.53      | 0.61   | 0.63   | 0.61   |
|         | 13       | 0.42        | 0.49      | 0.53   | 0.46      | 0.64   | 0.54   | 0.45   |
|         | 14       | 0.62        | 0.66      | 0.63   | 0.69      | 0.81   | 0.72   | 0.42   |
|         | 15       | 0.46        | 0.55      | 0.57   | 0.57      | 0.73   | 0.65   | 0.51   |
|         | 16       | 0.48        | 0.52      | 0.51   | 0.57      | 0.68   | 0.61   | 0.5    |
|         | 17       | 0.58        | 0.6       | 0.56   | 0.69      | 0.8    | 0.68   | 0.37   |
|         | 18       | 0.5         | 0.51      | 0.54   | 0.58      | 0.7    | 0.64   | 0.51   |

|    |      |      |      |      |      |      |      |
|----|------|------|------|------|------|------|------|
| 19 | 0.6  | 0.78 | 0.62 | 0.66 | 0.76 | 0.7  | 0.49 |
| 20 |      |      |      |      |      |      |      |
| 21 |      |      |      |      |      |      |      |
| 22 |      |      |      |      |      |      |      |
| 23 | 0.4  | 0.43 | 0.53 | 0.53 | 0.6  | 0.56 | 0.37 |
| 24 |      |      |      |      |      |      |      |
| 25 | 0.5  | 0.58 | 0.43 | 0.57 | 0.73 | 0.62 | 0.3  |
| 26 |      |      |      |      |      |      |      |
| 27 | 0.62 | 0.66 | 0.66 | 0.73 | 0.81 | 0.77 | 0.37 |

---

Table S15.3 CpG sites methylation level of IGF2 in CHD patients and healthy individuals

| Groups  | SampleID | CpG_20 | CpG_21.22 | CpG_23 | CpG_24.25 | CpG_26 | CpG_27 |
|---------|----------|--------|-----------|--------|-----------|--------|--------|
| Control | 1        | 0.44   | 0.46      | 0.64   | 0.66      | 0.64   | 0.69   |
|         | 2        | 0.39   | 0.4       | 0.55   | 0.5       | 0.55   | 0.59   |
|         | 3        |        |           |        |           |        |        |
|         | 4        |        |           |        |           |        |        |
|         | 5        | 0.43   | 0.53      | 0.66   | 0.63      | 0.66   | 0.72   |
|         | 6        |        |           |        |           |        |        |
|         | 7        | 0.43   | 0.47      | 0.64   | 0.63      | 0.64   | 0.72   |
|         | 8        | 0.36   | 0.51      | 0.62   | 0.64      | 0.62   | 0.7    |
|         | 9        | 0.38   | 0.41      | 0.64   | 0.63      | 0.64   | 0.75   |
|         | 10       |        |           |        |           |        |        |
|         | 11       |        |           |        |           |        |        |
|         | 12       | 0.36   | 0.39      | 0.61   | 0.6       | 0.61   | 0.69   |
|         | 13       |        |           |        |           |        |        |
|         | 14       | 0.37   | 0.44      | 0.62   | 0.65      | 0.62   | 0.71   |
|         | 15       |        |           |        |           |        |        |
|         | 16       | 0.43   | 0.56      | 0.68   | 0.61      | 0.68   | 0.73   |
|         | 17       | 0.44   | 0.43      | 0.62   | 0.62      | 0.62   | 0.7    |
|         | 18       | 0.46   | 0.5       | 0.65   | 0.69      | 0.65   | 0.64   |
|         | 19       |        |           |        |           |        |        |
|         | 20       |        |           |        |           |        |        |
|         | 21       | 0.45   | 0.56      | 0.68   | 0.79      | 0.68   | 0.74   |
|         | 22       |        |           |        |           |        |        |
|         | 23       | 0.44   | 0.38      | 0.63   | 0.64      | 0.63   | 0.73   |
|         | 24       | 0.4    | 0.43      | 0.62   | 0.65      | 0.62   | 0.71   |
|         | 25       | 0.38   | 0.36      | 0.58   | 0.58      | 0.58   | 0.62   |
|         | 26       | 0.36   | 0.39      | 0.54   | 0.53      | 0.54   | 0.65   |
|         | 27       | 0.41   | 0.57      | 0.58   | 0.6       | 0.58   | 0.65   |
| 28      |          |        |           |        |           |        |        |
| CHD     | 1        | 0.51   | 0.6       | 0.73   | 0.76      | 0.73   | 0.8    |
|         | 2        | 0.43   | 0.51      | 0.64   | 0.66      | 0.64   | 0.71   |
|         | 3        |        |           |        |           |        |        |
|         | 4        | 0.46   | 0.34      | 0.56   | 0.53      | 0.56   | 0.64   |
|         | 5        | 0.42   | 0.54      | 0.65   | 0.68      | 0.65   | 0.75   |
|         | 6        | 0.36   | 0.47      | 0.55   | 0.55      | 0.55   | 0.6    |
|         | 7        | 0.43   | 0.55      | 0.61   | 0.66      | 0.61   | 0.67   |
|         | 8        | 0.5    | 0.48      | 0.68   | 0.68      | 0.68   | 0.74   |
|         | 9        | 0.5    | 0.63      | 0.69   | 0.72      | 0.69   | 0.77   |
|         | 10       |        |           |        |           |        |        |
|         | 11       |        |           |        |           |        |        |
|         | 12       | 0.48   | 0.6       | 0.66   | 0.69      | 0.66   | 0.77   |
|         | 13       | 0.39   | 0.48      | 0.64   | 0.66      | 0.64   | 0.68   |
|         | 14       | 0.38   | 0.43      | 0.61   | 0.57      | 0.61   | 0.69   |
|         | 15       | 0.45   | 0.42      | 0.62   | 0.6       | 0.62   | 0.69   |
|         | 16       | 0.39   | 0.5       | 0.63   | 0.7       | 0.63   | 0.67   |
|         | 17       | 0.34   | 0.45      | 0.61   | 0.64      | 0.61   | 0.6    |
|         | 18       | 0.44   | 0.5       | 0.59   | 0.59      | 0.59   | 0.63   |

|    |      |      |      |      |      |      |
|----|------|------|------|------|------|------|
| 19 | 0.39 | 0.45 | 0.68 | 0.58 | 0.68 | 0.73 |
| 20 |      |      |      |      |      |      |
| 21 |      |      |      |      |      |      |
| 22 |      |      |      |      |      |      |
| 23 | 0.43 | 0.46 | 0.6  | 0.55 | 0.6  | 0.63 |
| 24 |      |      |      |      |      |      |
| 25 | 0.35 | 0.41 | 0.59 | 0.55 | 0.59 | 0.7  |
| 26 |      |      |      |      |      |      |
| 27 | 0.36 | 0.49 | 0.59 | 0.6  | 0.59 | 0.62 |

---
