# Supplementary material for: DNA methylation abnormalities of imprinted genes in congenital heart disease: a pilot study
Source: PubMed Central journal article supplement (PMC7789576; doi:10.1186/s12920-020-00848-0), 2021-01-06
Supplement: 12920_2020_848_MOESM25_ESM.pdf [file 12920_2020_848_MOESM25_ESM.pdf]

Table S16.1 CpG sites methylation level of H19 in CHD patients and healthy individuals

| Groups  | SampleID | CpG_1 | CpG_2 | CpG_3.4 | CpG_5 | CpG_6 | CpG_7.8.9 | CpG_10 |
|---------|----------|-------|-------|---------|-------|-------|-----------|--------|
|         | 1        |       |       |         |       |       |           |        |
|         | 2        | 0.26  | 0.07  | 0.48    | 0.18  | 0     | 0.17      | 0.71   |
|         | 3        | 0.34  | 0.44  | 0.57    | 0.28  | 0.38  | 0.44      | 0.94   |
|         | 4        |       |       |         |       |       |           |        |
|         | 5        | 0.52  | 0.38  | 0.47    | 0.43  | 0.46  | 0.53      | 0.56   |
|         | 6        | 0.53  | 0.59  | 0.6     | 1     | 0.49  | 0.55      | 0.69   |
|         | 7        | 0.29  | 0.5   | 0.47    | 0.42  | 0.5   | 0.56      | 0.48   |
|         | 8        |       |       |         |       |       |           |        |
|         | 9        | 0.38  | 0.39  | 0.36    | 0.4   | 0.4   | 0.43      | 0.65   |
|         | 10       | 0.41  | 0.34  | 0.41    | 0.4   | 0.43  | 0.53      | 0.83   |
|         | 11       | 0.47  | 0.37  | 0.45    | 0.36  | 0.41  | 0.51      | 0.82   |
|         | 12       | 0.5   | 0.26  | NA      | 0.51  | 0.28  | 0.41      | 0.66   |
|         | 13       | 0.48  | 0.41  | 0.48    | 0.37  | 0.35  | 0.46      | 0.83   |
| Control | 14       |       |       |         |       |       |           |        |
|         | 15       | 0.57  | 0.27  | 0.43    | 0.31  | 0.4   | 0.44      | 0.68   |
|         | 16       |       |       |         |       |       |           |        |
|         | 17       | 0.41  | 0.43  | 0.42    | 0.4   | 0.38  | 0.51      | 0.67   |
|         | 18       | 0.44  | 0.34  | 0.46    | 0.39  | 0.34  | 0.44      | 0.54   |
|         | 19       |       |       |         |       |       |           |        |
|         | 20       | 0.3   | 0.25  | 0.44    | 0.38  | 0.28  | 0.36      | 0.89   |
|         | 21       |       |       |         |       |       |           |        |
|         | 22       | 0.41  | 0.33  | 0.33    | 0.31  | 0.33  | 0.46      | 0.63   |
|         | 23       |       |       |         |       |       |           |        |
|         | 24       | 0.46  | 0.41  | 0.34    | 0.42  | 0.36  | 0.43      | 0.63   |
|         | 25       | 0.56  | NA    | 0.7     | 0.46  | 0.56  | 0.34      | 0.71   |
|         | 26       | 0.55  | 0.34  | 0.43    | 0.43  | 0.35  | 0.31      | 0.82   |
|         | 27       | 0.43  | 0.5   | 0.51    | 0.58  | 0.53  | 0.39      | 0.57   |
|         | 28       | 0.45  | NA    | NA      | 0.53  | 0.43  | 0.22      | 0.18   |
|         | 1        | 0.54  | 0.41  | 0.44    | 0.44  | 0.45  | 0.52      | 0.63   |
|         | 2        | 0.39  | 0.31  | 0.38    | 0.38  | 0.41  | 0.47      | 0.37   |
|         | 3        | 0.46  | 0.41  | 0.55    | 0.44  | 0.44  | 0.53      | 0.7    |
|         | 4        | 0.56  | 0.34  | 0.35    | 0.4   | 0.3   | 0.36      | 0.4    |
|         | 5        | 0.42  | 0.37  | 0.38    | 0.33  | 0.41  | 0.47      | 0.55   |
|         | 6        | 0.5   | 0.48  | 0.46    | 0.42  | 0.41  | 0.58      | 0.16   |
|         | 7        |       |       |         |       |       |           |        |
|         | 8        | 0.39  | 0.27  | 0.21    | 0.22  | 0.35  | 0.18      | 0.76   |
|         | 9        |       |       |         |       |       |           |        |
|         | 10       |       |       |         |       |       |           |        |
|         | 11       | 0.52  | NA    | 0.33    | 0.3   | 0.26  | 0.27      | 0.65   |
|         | 12       | 0.4   | 0.3   | 0.39    | 0.25  | 0.38  | 0.47      | 0.95   |
|         | 13       | 0.56  | 0.48  | 0.48    | 0.43  | 0.41  | 0.57      | 0.59   |
| CHD     | 14       |       |       |         |       |       |           |        |
|         | 15       | 0.51  | 0.22  | 0.29    | 0.31  | 0.31  | 0.19      | 0.97   |
|         | 16       |       |       |         |       |       |           |        |
|         | 17       | 0.39  | 0.37  | 0.43    | 0.38  | 0.38  | 0.51      | 0.49   |

|    |      |      |      |     |      |      |      |
|----|------|------|------|-----|------|------|------|
| 18 |      |      |      |     |      |      |      |
| 19 |      |      |      |     |      |      |      |
| 20 |      |      |      |     |      |      |      |
| 21 | 0.43 | 0.06 | 0.1  |     | 0.09 | 0.17 | 0.68 |
| 22 |      |      |      |     |      |      |      |
| 23 |      |      |      |     |      |      |      |
| 24 |      |      |      |     |      |      |      |
| 25 |      |      |      |     |      |      |      |
| 26 |      |      |      |     |      |      |      |
| 27 | 0.53 | 0.5  | 0.48 | 0.5 | 0.49 | 0.55 | 0.65 |

---

Table S16.2 CpG sites methylation level of H19 in CHD patients and healthy individuals

| Groups  | SampleID | CpG_11 | CpG_12 | CpG_13.14 | CpG_15 | CpG_16 |
|---------|----------|--------|--------|-----------|--------|--------|
| Control | 1        |        |        |           |        |        |
|         | 2        | 0.21   | 0.75   | 0.06      | 0.24   | 0.8    |
|         | 3        | 0.29   | 0.6    | 0.38      | 0.21   | 0.5    |
|         | 4        |        |        |           |        |        |
|         | 5        | 0.57   | 0.62   | 0.51      | 0.31   | 0.59   |
|         | 6        | 0.49   | 1      | 0.37      | 0.41   | 0.15   |
|         | 7        | 0.6    | 0.68   | 0.4       | 0.34   | 0.59   |
|         | 8        |        |        |           |        |        |
|         | 9        | 0.48   | 0.63   | 0.42      | 0.27   | 0.68   |
|         | 10       | 0.53   | 0.67   | 0.44      | 0.32   | 0.6    |
|         | 11       | 0.56   | 0.65   | 0.43      | 0.28   | 0.52   |
|         | 12       | 0.56   | 0.87   | 0.42      | 0.34   | 0.4    |
|         | 13       | 0.5    | 0.81   | 0.4       | 0.31   | 0.7    |
|         | 14       |        |        |           |        |        |
|         | 15       | 0.52   | 0.66   | 0.41      | 0.27   | 0.7    |
|         | 16       |        |        |           |        |        |
|         | 17       | 0.4    | 0.55   | 0.34      | 0.26   | 0.56   |
|         | 18       | 0.58   | 0.82   | 0.41      | 0.26   | 0.27   |
|         | 19       |        |        |           |        |        |
|         | 20       | 0.4    | 0.85   | 0.3       | 0.2    | 0.73   |
|         | 21       |        |        |           |        |        |
|         | 22       | 0.47   | 0.5    | 0.38      | 0.26   | 0.45   |
|         | 23       |        |        |           |        |        |
|         | 24       | 0.36   | 0.63   | 0.34      | 0.25   | 0.78   |
|         | 25       | 0.53   | NA     | 0.77      | 0.44   | 0.58   |
|         | 26       | 0.27   | 0.82   | 0.31      | 0.33   | 0.43   |
|         | 27       | 0.5    | 0.6    | 0.43      | 0.41   | 0.59   |
|         | 28       | 0.36   | 1      | 0.44      | 0.4    | 0.75   |
| CHD     | 1        | 0.78   | 0.73   | 0.44      | 0.29   | 0.31   |
|         | 2        | 0.4    | 0.65   | 0.37      | 0.28   | 0.44   |
|         | 3        | 0.51   | 0.79   | 0.48      | 0.3    | 0.7    |
|         | 4        | 0.77   | 0.6    | 0.36      | 0.21   | 0.55   |
|         | 5        | 0.43   | 0.57   | 0.32      | 0.26   | 0.51   |
|         | 6        | 0.56   | 0.64   | 0.47      | 0.33   | 0.4    |
|         | 7        |        |        |           |        |        |
|         | 8        | 0.23   | 0.81   | 0.18      | 0.26   | 0.61   |
|         | 9        |        |        |           |        |        |
|         | 10       |        |        |           |        |        |
|         | 11       | 0.61   | 1      | 0.43      | 0.41   | 0.54   |
|         | 12       | 0.46   | 0.75   | 0.34      | 0.26   | 0.55   |
|         | 13       | 0.5    | 0.6    | 0.46      | 0.31   | 0.49   |
|         | 14       |        |        |           |        |        |
|         | 15       | 0.35   | 0.69   | 0.34      | 0.21   | 0.42   |
|         | 16       |        |        |           |        |        |
|         | 17       | 0.37   | 0.56   | 0.33      | 0.24   | 0.6    |

|    |      |      |      |      |      |
|----|------|------|------|------|------|
| 18 |      |      |      |      |      |
| 19 |      |      |      |      |      |
| 20 |      |      |      |      |      |
| 21 | 0.24 | 0.75 | 0.13 | 0.23 | 0.85 |
| 22 |      |      |      |      |      |
| 23 |      |      |      |      |      |
| 24 |      |      |      |      |      |
| 25 |      |      |      |      |      |
| 26 |      |      |      |      |      |
| 27 | 0.63 | 0.5  | 0.53 | 0.33 | 0.5  |

---
