# Supplementary material for: DNA methylation abnormalities of imprinted genes in congenital heart disease: a pilot study
Source: PubMed Central journal article supplement (PMC7789576; doi:10.1186/s12920-020-00848-0), 2021-01-06
Supplement: 12920_2020_848_MOESM26_ESM.pdf [file 12920_2020_848_MOESM26_ESM.pdf]

Table S17.1 CpG sites methylation level of IG in CHD patients and healthy individuals

| Groups  | SampleID | CpG_1.2.3 | CpG_4.5 | CpG_6 | CpG_7 | CpG_8 | CpG_9.10 |
|---------|----------|-----------|---------|-------|-------|-------|----------|
|         | 1        |           |         |       |       |       |          |
|         | 2        | 0.67      | 0.13    | 0.72  | 0.41  | 0.77  | 0.58     |
|         | 3        |           |         |       |       |       |          |
|         | 4        | 0.72      | 0.51    | 0.59  | 0.59  | 0.8   | 0.58     |
|         | 5        | 0.62      | 0.2     | 0.57  | 0.56  | 0.69  | 0.61     |
|         | 6        | 0.6       | 0.2     | 0.59  | 0.33  | 0.75  | 0.58     |
|         | 7        | 0.63      | 0.08    | 0.64  | 0.37  | 0.77  | 0.62     |
|         | 8        |           |         |       |       |       |          |
|         | 9        |           |         |       |       |       |          |
|         | 10       | 0.59      | 0.66    | 0.6   | 0.49  | 0.71  | 0.61     |
|         | 11       |           |         |       |       |       |          |
|         | 12       | 0.63      | 0.55    | 0.51  | 0.7   | 0.74  | 0.54     |
|         | 13       | 0.65      | 0.31    | 0.62  | 0.48  | 0.79  | 0.62     |
| Control | 14       |           |         |       |       |       |          |
|         | 15       |           |         |       |       |       |          |
|         | 16       |           |         |       |       |       |          |
|         | 17       | 0.61      | 0.55    | 0.6   | 0.31  | 0.75  | 0.59     |
|         | 18       | 0.62      | 0.46    | 0.59  | 0.61  | 0.74  | 0.58     |
|         | 19       | 0.54      | 0.48    | 0.58  | 0.43  | 0.79  | 0.59     |
|         | 20       |           |         |       |       |       |          |
|         | 21       | 0.65      | 0.55    | 0.57  | 0.46  | 0.75  | 0.57     |
|         | 22       | 0.63      | 0.61    | 0.56  | 0.34  | 0.8   | 0.61     |
|         | 23       | 0.59      | 0.02    | 0.44  | 0.05  | 0.59  | 0.58     |
|         | 24       | 0.68      | 0.03    | 0.57  | 0.07  | 0.54  | 0.61     |
|         | 25       | 0.52      | 0.3     | 0.54  | 0.25  | 0.71  | 0.57     |
|         | 26       | 0.61      | 0.04    | 0.57  | 0.17  | 0.76  | 0.57     |
|         | 27       |           |         |       |       |       |          |
|         | 28       | 0.59      | 0.04    | 0.58  | 0.18  | 0.79  | 0.57     |
|         | 1        | 0.67      | 0.5     | 0.56  | 0.61  | 0.73  | 0.56     |
|         | 2        | 0.55      | 0.49    | 0.58  | 0.29  | 0.72  | 0.56     |
|         | 3        | 0.46      | 0.41    | 0.53  | 0.47  | 0.74  | 0.6      |
|         | 4        | 0.55      | 0.48    | 0.55  | 0.69  | 0.73  | 0.54     |
|         | 5        | 0.6       | 0.49    | 0.59  | 0.6   | 0.78  | 0.61     |
|         | 6        | 0.62      | 0.58    | 0.56  | 0.3   | 0.78  | 0.56     |
|         | 7        | 0.56      | 0.51    | 0.51  | 0.52  | 0.74  | 0.57     |
|         | 8        | 0.61      | 0.55    | 0.54  | 0.16  | 0.69  | 0.55     |
|         | 9        | 0.58      | 0.51    | 0.6   | 0.52  | 0.66  | 0.58     |
|         | 10       | 0.54      | 0.42    | 0.53  | 0.32  | 0.6   | 0.55     |
|         | 11       | 0.53      | 0.49    | 0.55  | 0.61  | 0.72  | 0.58     |
|         | 12       | 0.58      | 0.52    | 0.52  | 0.3   | 0.75  | 0.6      |
|         | 13       |           |         |       |       |       |          |
| CHD     | 14       |           |         |       |       |       |          |
|         | 15       | 0.6       | 0.56    | 0.57  | 0.58  | 0.81  | 0.55     |
|         | 16       |           |         |       |       |       |          |
|         | 17       | 0.63      | 0.15    | 0.66  | 0.42  | 0.72  | 0.64     |
|         | 18       |           |         |       |       |       |          |

|    |      |      |      |      |      |      |
|----|------|------|------|------|------|------|
| 19 | 0.51 | 0.47 | 0.45 | 0.46 | 0.66 | 0.61 |
| 20 | 0.45 | 0.43 | 0.42 | 0.35 | 0.62 | 0.6  |
| 21 | 0.37 | 0.02 | 0.51 | 0.06 | 0.51 | 0.53 |
| 22 |      |      |      |      |      |      |
| 23 |      |      |      |      |      |      |
| 24 |      |      |      |      |      |      |
| 25 | 0.48 | 0.08 | 0.54 | 0.13 | 0.68 | 0.64 |
| 26 |      |      |      |      |      |      |
| 27 |      |      |      |      |      |      |

---

Table S17.2 CpG sites methylation level of IG in CHD patients and healthy individuals

| Groups  | SampleID | CpG_11.12 | CpG_13 | CpG_14 | CpG_15 | CpG_16 | CpG_17 | CpG_18 |
|---------|----------|-----------|--------|--------|--------|--------|--------|--------|
|         | 1        |           |        |        |        |        |        |        |
|         | 2        | 0.63      | 0.66   | 0.41   | 0.41   | 0.42   | 0.52   | 0.62   |
|         | 3        |           |        |        |        |        |        |        |
|         | 4        | 0.7       | 0.76   | 0.44   | 0.44   | 0.5    | 0.46   | 0.53   |
|         | 5        | 0.68      | 0.7    | 0.45   | 0.45   | 0.48   | 0.4    | 0.46   |
|         | 6        | 0.66      | 0.66   | 0.42   | 0.42   | 0.48   | 0.37   | 0.42   |
|         | 7        | 0.67      | 0.68   | 0.46   | 0.46   | 0.48   | 0.45   | 0.44   |
|         | 8        |           |        |        |        |        |        |        |
|         | 9        |           |        |        |        |        |        |        |
|         | 10       | 0.76      | 0.72   | 0.45   | 0.45   | 0.51   | 0.4    | 0.44   |
|         | 11       |           |        |        |        |        |        |        |
|         | 12       | 0.61      | 0.67   | 0.38   | 0.38   | 0.4    | 0.35   | 0.55   |
|         | 13       | 0.72      | 0.7    | 0.47   | 0.47   | 0.53   | 0.42   | 0.4    |
| Control | 14       |           |        |        |        |        |        |        |
|         | 15       |           |        |        |        |        |        |        |
|         | 16       |           |        |        |        |        |        |        |
|         | 17       | 0.69      | 0.71   | 0.44   | 0.44   | 0.53   | 0.35   | 0.39   |
|         | 18       | 0.68      | 0.67   | 0.45   | 0.45   | 0.45   | 0.45   | 0.48   |
|         | 19       | 0.67      | 0.68   | 0.43   | 0.43   | 0.47   | 0.37   | 0.41   |
|         | 20       |           |        |        |        |        |        |        |
|         | 21       | 0.64      | 0.7    | 0.42   | 0.42   | 0.47   | 0.4    | 0.4    |
|         | 22       | 0.79      | 0.81   | 0.49   | 0.49   | 0.45   | 0.57   | 0.5    |
|         | 23       | 0.68      | 0.69   | 0.43   | 0.43   | 0.45   | 0.4    | 0.41   |
|         | 24       | 0.72      | 0.72   | 0.46   | 0.46   | 0.56   | 0.48   | 0.39   |
|         | 25       | 0.6       | 0.56   | 0.42   | 0.42   | 0.4    | 0.43   | 0.34   |
|         | 26       | 0.56      | 0.55   | 0.38   | 0.38   | 0.39   | 0.39   | 0.55   |
|         | 27       |           |        |        |        |        |        |        |
|         | 28       | 0.59      | 0.6    | 0.39   | 0.39   | 0.4    | 0.3    | 0.44   |
|         | 1        | 0.56      | 0.58   | 0.4    | 0.4    | 0.42   | 0.33   | 0.4    |
|         | 2        | 0.49      | 0.53   | 0.41   | 0.41   | 0.4    | 0.37   | 0.31   |
|         | 3        | 0.74      | 0.73   | 0.48   | 0.48   | 0.44   | 0.62   | 0.59   |
|         | 4        | 0.6       | 0.6    | 0.39   | 0.39   | 0.39   | 0.42   | 0.45   |
|         | 5        | 0.74      | 0.67   | 0.45   | 0.45   | 0.53   | 0.38   | 0.43   |
|         | 6        | 0.57      | 0.55   | 0.41   | 0.41   | 0.43   | 0.38   | 0.35   |
|         | 7        | 0.67      | 0.63   | 0.43   | 0.43   | 0.52   | 0.38   | 0.39   |
|         | 8        | 0.63      | 0.61   | 0.41   | 0.41   | 0.45   | 0.4    | 0.4    |
|         | 9        | 0.59      | 0.56   | 0.43   | 0.43   | 0.47   | 0.51   | 0.43   |
|         | 10       | 0.6       | 0.59   | 0.4    | 0.4    | 0.4    | 0.36   | 0.35   |
|         | 11       | 0.65      | 0.6    | 0.44   | 0.44   | 0.43   | 0.47   | 0.53   |
|         | 12       | 0.7       | 0.6    | 0.43   | 0.43   | 0.37   | 0.4    | 0.43   |
|         | 13       |           |        |        |        |        |        |        |
| CHD     | 14       |           |        |        |        |        |        |        |
|         | 15       | 0.59      | 0.61   | 0.4    | 0.4    | 0.43   | 0.31   | 0.43   |
|         | 16       |           |        |        |        |        |        |        |
|         | 17       | 0.73      | 0.67   | 0.49   | 0.49   | 0.51   | 0.46   | 0.37   |
|         | 18       |           |        |        |        |        |        |        |

|    |      |      |      |      |      |      |      |
|----|------|------|------|------|------|------|------|
| 19 | 0.7  | 0.7  | 0.45 | 0.45 | 0.49 | 0.39 | 0.42 |
| 20 | 0.66 | 0.63 | 0.46 | 0.46 | 0.46 | 0.45 | 0.6  |
| 21 | 0.53 | 0.48 | 0.36 | 0.36 | 0.34 | 0.39 | 0.27 |
| 22 |      |      |      |      |      |      |      |
| 23 |      |      |      |      |      |      |      |
| 24 |      |      |      |      |      |      |      |
| 25 | 0.65 | 0.75 | 0.48 | 0.48 | 0.47 | 0.4  | 0.24 |
| 26 |      |      |      |      |      |      |      |
| 27 |      |      |      |      |      |      |      |

---

Table S17.3 CpG sites methylation level of IG in CHD patients and healthy individuals

| Groups  | SampleID | CpG_19.20 | CpG_21 | CpG_22 | CpG_23 | CpG_24 | CpG_25 | CpG_26 |
|---------|----------|-----------|--------|--------|--------|--------|--------|--------|
|         | 1        |           |        |        |        |        |        |        |
|         | 2        | 0.64      | 0.6    | 0.86   | 0.68   | 0.57   | 0.55   | 0.55   |
|         | 3        |           |        |        |        |        |        |        |
|         | 4        | 0.67      | 0.55   | 0.64   | 0.67   | 0.53   | 0.53   | 0.53   |
|         | 5        | 0.66      | 0.54   | 0.57   | 0.7    | 0.48   | 0.52   | 0.52   |
|         | 6        | 0.59      | 0.43   | 0.56   | 0.67   | 0.47   | 0.47   | 0.47   |
|         | 7        | 0.69      | 0.53   | 0.7    | 0.7    | 0.52   | 0.5    | 0.5    |
|         | 8        |           |        |        |        |        |        |        |
|         | 9        |           |        |        |        |        |        |        |
|         | 10       | 0.69      | 0.47   | 0.65   | 0.69   | 0.53   | 0.49   | 0.49   |
|         | 11       |           |        |        |        |        |        |        |
|         | 12       | 0.64      | 0.58   | 0.64   | 0.63   | 0.49   | 0.5    | 0.5    |
|         | 13       | 0.62      | 0.49   | 0.55   | 0.63   | 0.47   | 0.43   | 0.43   |
| Control | 14       |           |        |        |        |        |        |        |
|         | 15       |           |        |        |        |        |        |        |
|         | 16       |           |        |        |        |        |        |        |
|         | 17       | 0.61      | 0.48   | 0.62   | 0.65   | 0.44   | 0.49   | 0.49   |
|         | 18       | 0.68      | 0.44   | 0.68   | 0.7    | 0.52   | 0.55   | 0.55   |
|         | 19       | 0.61      | 0.49   | 0.65   | 0.66   | 0.45   | 0.46   | 0.46   |
|         | 20       |           |        |        |        |        |        |        |
|         | 21       | 0.66      | 0.46   | 0.63   | 0.64   | 0.47   | 0.52   | 0.52   |
|         | 22       | 0.79      | 0.56   | 0.77   | 0.81   | 0.6    | 0.57   | 0.57   |
|         | 23       | 0.62      | 0.5    | 0.62   | 0.69   | 0.42   | 0.51   | 0.51   |
|         | 24       | 0.62      | 0.46   | 0.6    | 0.67   | 0.47   | 0.47   | 0.47   |
|         | 25       | 0.53      | 0.42   | 0.68   | 0.77   | 0.49   | 0.52   | 0.52   |
|         | 26       | 0.6       | 0.46   | 0.61   | 0.64   | 0.49   | 0.56   | 0.56   |
|         | 27       |           |        |        |        |        |        |        |
|         | 28       | 0.46      | 0.47   | 0.53   | 0.81   | 0.43   | 0.44   | 0.44   |
|         | 1        | 0.51      | 0.37   | 0.46   | 0.51   | 0.47   | 0.47   | 0.47   |
|         | 2        | 0.57      | 0.38   | 0.56   | 0.6    | 0.45   | 0.49   | 0.49   |
|         | 3        | 0.72      | 0.72   | 0.75   | 0.81   | 0.54   | 0.64   | 0.64   |
|         | 4        | 0.61      | 0.46   | 0.6    | 0.62   | 0.51   | 0.58   | 0.58   |
|         | 5        | 0.58      | 0.47   | 0.59   | 0.58   | 0.5    | 0.46   | 0.46   |
|         | 6        | 0.53      | 0.35   | 0.5    | 0.56   | 0.5    | 0.45   | 0.45   |
|         | 7        | 0.57      | 0.44   | 0.54   | 0.55   | 0.51   | 0.41   | 0.41   |
|         | 8        | 0.5       | 0.47   | 0.49   | 0.54   | 0.42   | 0.42   | 0.42   |
|         | 9        | 0.67      | 0.4    | 0.73   | 0.76   | 0.62   | 0.62   | 0.62   |
|         | 10       | 0.54      | 0.44   | 0.57   | 0.72   | 0.43   | 0.42   | 0.42   |
|         | 11       | 0.64      | 0.56   | 0.71   | 0.63   | 0.53   | 0.6    | 0.6    |
|         | 12       | 0.62      | 0.45   | 0.57   | 0.62   | 0.52   | 0.49   | 0.49   |
|         | 13       |           |        |        |        |        |        |        |
| CHD     | 14       |           |        |        |        |        |        |        |
|         | 15       | 0.54      | 0.46   | 0.55   | 0.55   | 0.44   | 0.45   | 0.45   |
|         | 16       |           |        |        |        |        |        |        |
|         | 17       | 0.57      | 0.41   | 0.58   | 0.62   | 0.48   | 0.48   | 0.48   |
|         | 18       |           |        |        |        |        |        |        |

|    |      |      |      |      |      |      |      |
|----|------|------|------|------|------|------|------|
| 19 | 0.56 | 0.47 | 0.6  | 0.62 | 0.5  | 0.51 | 0.51 |
| 20 | 0.62 | 0.61 | 0.68 | 0.67 | 0.53 | 0.54 | 0.54 |
| 21 | 0.59 | 0.31 | 0.62 | 0.72 | 0.47 | 0.53 | 0.53 |
| 22 |      |      |      |      |      |      |      |
| 23 |      |      |      |      |      |      |      |
| 24 |      |      |      |      |      |      |      |
| 25 | 0.53 | 0.2  | 0.64 | 0.72 | 0.48 | 0.5  | 0.5  |
| 26 |      |      |      |      |      |      |      |
| 27 |      |      |      |      |      |      |      |

---
