# Supplementary material for: DNA methylation abnormalities of imprinted genes in congenital heart disease: a pilot study
Source: PubMed Central journal article supplement (PMC7789576; doi:10.1186/s12920-020-00848-0), 2021-01-06
Supplement: 12920_2020_848_MOESM27_ESM.pdf [file 12920_2020_848_MOESM27_ESM.pdf]

**Table S18 CpG sites methylation level of MEG3 in CHD patients and healthy individuals**

| Groups  | SampleID | CpG_1 | CpG_2   | CpG_3.4 | CpG_5 | CpG_6 | CpG_7 |
|---------|----------|-------|---------|---------|-------|-------|-------|
| Control | 1        |       |         |         |       |       |       |
|         | 2        | 0.46  | 0.49    | 0.57    | 0.57  | 0.5   | 0.58  |
|         | 3        | 0.41  | 0.41    | 0.33    | 0.45  | 0.38  | 0.52  |
|         | 4        | 0.46  | 0.48    | 0.5     | 0.53  | 0.48  | 0.54  |
|         | 5        | 0.47  | 0.43    | 0.37    | 0.46  | 0.4   | 0.54  |
|         | 6        | 0.51  | 0.46    | 0.38    | 0.47  | 0.37  | 0.61  |
|         | 7        | 0.48  | 0.49    | 0.43    | 0.54  | 0.42  | 0.61  |
|         | 8        | 0.48  | 0.54    | 0.43    | 0.56  | 0.45  | 0.61  |
|         | 9        | 0.41  | 0.44    | 0.37    | 0.42  | 0.37  | 0.51  |
|         | 10       | 0.38  | 0.46    | 0.33    | 0.46  | 0.39  | 0.5   |
|         | 11       |       |         |         |       |       |       |
|         | 12       | 0.4   | 0.4     | 0.33    | 0.4   | 0.34  | 0.47  |
|         | 13       | 0.42  | 0.39    | 0.36    | 0.42  | 0.36  | 0.5   |
|         | 14       | 0.48  | 0.47    | 0.5     | 0.51  | 0.41  | 0.59  |
|         | 15       | 0.49  | 0.44    | 0.43    | 0.48  | 0.42  | 0.56  |
|         | 16       | 0.48  | 0.46    | 0.38    | 0.49  | 0.4   | 0.56  |
|         | 17       | 0.41  | 0.4     | 0.34    | 0.4   | 0.34  | 0.47  |
|         | 18       | 0.42  | 0.4     | 0.37    | 0.46  | 0.35  | 0.51  |
|         | 19       | 0.42  | 0.47    | 0.37    | 0.48  | 0.43  | 0.55  |
|         | 20       |       |         |         |       |       |       |
|         | 21       | 0.5   | 0.47    | 0.48    | 0.5   | 0.47  | 0.57  |
|         | 22       | 0.45  | 0.47    | 0.46    | 0.51  | 0.43  | 0.56  |
|         | 23       | 0.42  | 0.41    | 0.32    | 0.42  | 0.37  | 0.49  |
|         | 24       | 0.46  | 0.44    | 0.37    | 0.45  | 0.39  | 0.54  |
|         | 25       | 0.41  | 0.46    | 0.44    | 0.47  | 0.4   | 0.56  |
|         | 26       | 0.41  | 0.46    | 0.44    | 0.47  | 0.42  | 0.49  |
|         | 27       | 0.48  | 0.46    | 0.34    | 0.47  | 0.4   | 0.58  |
|         | 28       |       |         |         |       |       |       |
| CHD     | 1        |       |         |         |       |       |       |
|         | 2        | 0.44  | 0.48    | 0.49    | 0.49  | 0.42  | 0.51  |
|         | 3        | 0.4   | 0.42    | 0.35    | 0.42  | 0.36  | 0.47  |
|         | 4        | 0.37  | 0.39    | 0.37    | 0.4   | 0.44  | 0.47  |
|         | 5        | 0.37  | 0.35    | 0.28    | 0.4   | 0.33  | 0.46  |
|         | 6        | 0.38  | 0.36    | 0.31    | 0.4   | 0.36  | 0.46  |
|         | 7        | 0.39  | 0.35 NA |         | 0.43  | 0.39  | 0.54  |
|         | 8        |       |         |         |       |       |       |
|         | 9        | 0.37  | 0.37    | 0.31    | 0.35  | 0.28  | 0.41  |
|         | 10       | 0.45  | 0.41    | 0.48    | 0.43  | 0.38  | 0.54  |
|         | 11       | 0.35  | 0.39    | 0.35    | 0.42  | 0.37  | 0.48  |
|         | 12       | 0.36  | 0.38    | 0.32    | 0.41  | 0.3   | 0.46  |
|         | 13       | 0.36  | 0.37    | 0.29    | 0.39  | 0.34  | 0.44  |
|         | 14       | 0.39  | 0.44    | 0.35    | 0.37  | 0.36  | 0.5   |
|         | 15       | 0.36  | 0.37    | 0.26    | 0.38  | 0.32  | 0.47  |
|         | 16       |       |         |         |       |       |       |
|         | 17       |       |         |         |       |       |       |
|         | 18       | 0.36  | 0.44    | 0.41    | 0.43  | 0.33  | 0.53  |

|    |      |      |      |      |      |      |
|----|------|------|------|------|------|------|
| 19 | 0.38 | 0.42 | 0.43 | 0.45 | 0.44 | 0.56 |
| 20 |      |      |      |      |      |      |
| 21 |      |      |      |      |      |      |
| 22 | 0.4  | 0.37 | 0.33 | 0.41 | 0.36 | 0.47 |
| 23 | 0.39 | 0.39 | 0.32 | 0.37 | 0.32 | 0.45 |
| 24 |      |      |      |      |      |      |
| 25 | 0.39 | 0.4  | 0.3  | 0.45 | 0.38 | 0.45 |
| 26 | 0.46 | 0.43 | 0.32 | 0.42 | 0.37 | 0.45 |
| 27 | 0.34 | 0.36 | 0.27 | 0.38 | 0.3  | 0.41 |

---
