# Supplementary material for: DNA methylation abnormalities of imprinted genes in congenital heart disease: a pilot study
Source: PubMed Central journal article supplement (PMC7789576; doi:10.1186/s12920-020-00848-0), 2021-01-06
Supplement: 12920_2020_848_MOESM28_ESM.pdf [file 12920_2020_848_MOESM28_ESM.pdf]

Table S19 CpG sites methylation level of KCNQ1OT1 in CHD patients and healthy individuals

| Groups  | SampleID | CpG_1.2.3 | CpG_4.5.6 | CpG_7 | CpG_8.9 | CpG_10.11 |
|---------|----------|-----------|-----------|-------|---------|-----------|
| Control | 1        | NA        | 0.54      | 0.28  | 0.37    | 0.37      |
|         | 2        | 0.37      | 0.5       | 0.27  | 0.38    | 0.38      |
|         | 3        | 0.37      | 0.43      | 0.25  | 0.36    | 0.36      |
|         | 4        | 0.39      | 0.48      | 0.23  | 0.43    | 0.43      |
|         | 5        | 0.34      | 0.53      | 0.25  | 0.4     | 0.4       |
|         | 6        | 0.38      | 0.4       | 0.19  | 0.36    | 0.36      |
|         | 7        | 0.41      | 0.53      | 0.26  | 0.39    | 0.39      |
|         | 8        | 0.4       | 0.55      | 0.25  | 0.42    | 0.42      |
|         | 9        | 0.34      | 0.45      | 0.25  | 0.38    | 0.38      |
|         | 10       | 0.36      | 0.5       | 0.25  | 0.41    | 0.41      |
|         | 11       | 0.44      | 0.5       | 0.29  | 0.39    | 0.39      |
|         | 12       | 0.4       | 0.5       | 0.29  | 0.35    | 0.35      |
|         | 13       | 0.41      | 0.5       | 0.24  | 0.37    | 0.37      |
|         | 14       |           |           |       |         |           |
|         | 15       | NA        | 0.62      | 0.29  | 0.42    | 0.42      |
|         | 16       | 0.38      | 0.48      | 0.24  | 0.37    | 0.37      |
|         | 17       |           |           |       |         |           |
|         | 18       | NA        | 0.52      | 0.32  | 0.42    | 0.42      |
|         | 19       | 0.38      | 0.43      | 0.23  | 0.35    | 0.35      |
|         | 20       |           |           |       |         |           |
|         | 21       | 0.42      | 0.48      | 0.23  | 0.35    | 0.35      |
|         | 22       | 0.39      | 0.4       | 0.28  | 0.38    | 0.38      |
|         | 23       | 0.4       | 0.55      | 0.25  | 0.39    | 0.39      |
|         | 24       | 0.37      | 0.51      | 0.23  | 0.37    | 0.37      |
|         | 25       | 0.49      | 0.53      | 0.27  | 0.45    | 0.45      |
|         | 26       |           |           |       |         |           |
| 27      | 0.4      | 0.51      | 0.28      | 0.38  | 0.38    |           |
| 28      | 0.36     | 0.47      | 0.21      | 0.37  | 0.37    |           |
| CHD     | 1        | 0.4       | 0.48      | 0.27  | 0.42    | 0.42      |
|         | 2        | NA        | 0.45      | 0.29  | 0.41    | 0.41      |
|         | 3        | 0.35      | 0.4       | 0.23  | 0.35    | 0.35      |
|         | 4        | 0.38      | 0.43      | 0.24  | 0.33    | 0.33      |
|         | 5        | NA        | 0.62      | 0.28  | 0.37    | 0.37      |
|         | 6        | 0.27      | 0.38      | 0.2   | 0.28    | 0.28      |
|         | 7        | 0.46      | 0.48      | 0.28  | 0.4     | 0.4       |
|         | 8        | 0.37      | 0.48      | 0.26  | 0.4     | 0.4       |
|         | 9        |           |           |       |         |           |
|         | 10       | 0.37      | 0.49      | 0.25  | 0.37    | 0.37      |
|         | 11       | 0.4       | 0.56      | 0.32  | 0.45    | 0.45      |
|         | 12       | 0.38      | 0.44      | 0.21  | 0.33    | 0.33      |
|         | 13       | 0.44      | 0.42      | 0.27  | 0.42    | 0.42      |
|         | 14       | 0.47      | 0.57      | 0.27  | 0.37    | 0.37      |
|         | 15       | 0.37      | 0.51      | 0.19  | 0.29    | 0.29      |
|         | 16       | 0.35      | 0.45      | 0.26  | 0.34    | 0.34      |
|         | 17       | 0.4       | 0.48      | 0.25  | 0.41    | 0.41      |
|         | 18       | 0.33      | 0.45      | 0.22  | 0.36    | 0.36      |

|       |      |      |      |      |      |
|-------|------|------|------|------|------|
| 19    | 0.31 | 0.52 | 0.28 | 0.4  | 0.4  |
| 20    | 0.38 | 0.48 | 0.26 | 0.39 | 0.39 |
| 21 NA |      | 0.53 | 0.26 | 0.46 | 0.46 |
| 22    |      |      |      |      |      |
| 23    | 0.39 | 0.5  | 0.24 | 0.33 | 0.33 |
| 24    | 0.39 | 0.52 | 0.31 | 0.4  | 0.4  |
| 25    |      |      |      |      |      |
| 26    | 0.46 | 0.54 | 0.3  | 0.43 | 0.43 |
| 27    | 0.45 | 0.57 | 0.27 | 0.43 | 0.43 |

---
