# Supplementary material for: DNA methylation abnormalities of imprinted genes in congenital heart disease: a pilot study
Source: PubMed Central journal article supplement (PMC7789576; doi:10.1186/s12920-020-00848-0), 2021-01-06
Supplement: 12920_2020_848_MOESM29_ESM.pdf [file 12920_2020_848_MOESM29_ESM.pdf]

Table S20.1 CpG sites methylation level of SNRPN in CHD patients and healthy individuals

| Groups  | SampleID | CpG_1 | CpG_2 | CpG_3.4.5.6 | CpG_7.8 | CpG_9 | CpG_10 | CpG_11 |
|---------|----------|-------|-------|-------------|---------|-------|--------|--------|
| Control | 1        | 0.21  | 0.18  | 0.33        | 0.15    | 0.36  | 0.23   | 0.38   |
|         | 2        | 0.26  | 0.27  | 0.29        | 0.11    | 0.29  | 0.27   | 0.38   |
|         | 3        |       |       |             |         |       |        |        |
|         | 4        | 0.26  | 0.23  | 0.33        | 0.14    | 0.4   | 0.23   | 0.34   |
|         | 5        |       |       |             |         |       |        |        |
|         | 6        | 0.27  | 0.3   | 0.39        | 0.16    | 0.29  | 0.33   | 0.4    |
|         | 7        | 0.22  | 0.23  | 0.31        | 0.13    | 0.27  | 0.31   | 0.34   |
|         | 8        | 0.23  | 0.34  | 0.44        | 0.21    | 0.4   | 0.4    | 0.43   |
|         | 9        | 0.28  | 0.27  | 0.38        | 0.16    | 0.32  | 0.28   | 0.35   |
|         | 10       | 0.26  | 0.2   | 0.36        | 0.15    | 0.39  | 0.28   | 0.38   |
|         | 11       | 0.27  | 0.28  | 0.94        | 0.16    | 0.44  | 0.31   | 0.4    |
|         | 12       | 0.21  | 0.27  | 0.36        | 0.14    | 0.26  | 0.28   | 0.39   |
|         | 13       | 0.32  | 0.27  | 0.37        | 0.17    | 0.43  | 0.24   | 0.42   |
|         | 14       | 0.22  | 0.24  | 0.32        | 0.11    | 0.32  | 0.25   | 0.33   |
|         | 15       | 0.41  | 0.34  | 0.34        | 0.13    | 0.48  | 0.31   | 0.36   |
|         | 16       | 0.26  | 0.22  | 0.31        | 0.13    | 0.36  | 0.26   | 0.35   |
|         | 17       | 0.22  | 0.15  | 0.37        | 0.17    | 0.48  | 0.23   | 0.38   |
|         | 18       | 0.24  | 0.24  | 0.37        | 0.17    | 0.42  | 0.32   | 0.37   |
|         | 19       | 0.2   | 0.21  | 0.33        | 0.1     | 0.33  | 0.18   | 0.41   |
|         | 20       |       |       |             |         |       |        |        |
|         | 21       | 0.23  | 0.19  | 0.32        | 0.12    | 0.3   | 0.25   | 0.33   |
|         | 22       | 0.29  | 0.25  | 0.37        | 0.15    | 0.44  | 0.3    | 0.38   |
|         | 23       | 0.29  | 0.22  | 0.37        | 0.16    | 0.37  | 0.31   | 0.37   |
|         | 24       | 0.3   | 0.26  | 0.31        | 0.16    | 0.41  | 0.31   | 0.41   |
|         | 25       | 0.36  | 0.4   | 0.48        | 0.2     | 0.35  | 0.4    | 0.41   |
|         | 26       | 0.25  | 0.28  | 0.42        | 0.16    | 0.38  | 0.35   | 0.37   |
|         | 27       |       |       |             |         |       |        |        |
| 28      | 0.32     | 0.34  | 0.34  | 0.19        | 0.43    | 0.33  | 0.31   |        |
| CHD     | 1        | 0.22  | 0.2   | 0.35        | 0.16    | 0.26  | 0.26   | 0.31   |
|         | 2        | 0.32  | 0.22  | 0.33        | 0.19    | 0.5   | 0.33   | 0.46   |
|         | 3        | 0.4   | 0.25  | 0.39        | 0.18    | 0.32  | 0.3    | 0.38   |
|         | 4        | 0.27  | 0.27  | 0.37        | 0.13    | 0.42  | 0.27   | 0.38   |
|         | 5        | 0.25  | 0.2   | 0.36        | 0.15    | 0.38  | 0.26   | 0.35   |
|         | 6        | 0.14  | 0.16  | 0.29        | 0.11    | 0.29  | 0.2    | 0.34   |
|         | 7        | 0.29  | 0.23  | 0.84        | 0.15    | 0.39  | 0.25   | 1      |
|         | 8        | 0.28  | 0.24  | 0.35        | 0.15    | 0.39  | 0.25   | 0.39   |
|         | 9        | 0.25  | 0.22  | 0.36        | 0.14    | 0.31  | 0.31   | 0.34   |
|         | 10       | 0.25  | 0.22  | 0.36        | 0.13    | 0.32  | 0.27   | 0.33   |
|         | 11       | 0.31  | 0.21  | 0.37        | 0.19    | 0.43  | 0.32   | 0.39   |
|         | 12       | 0.16  | 0.26  | 0.31        | 0.11    | 0.16  | 0.2    | 0.33   |
|         | 13       | 0.25  | 0.21  | 0.32        | 0.16    | 0.36  | 0.34   | 0.34   |
|         | 14       |       |       |             |         |       |        |        |
|         | 15       | 0.24  | 0.2   | 0.33        | 0.13    | 0.36  | 0.24   | 0.36   |
|         | 16       | 0.26  | 0.13  | 0.33        | 0.14    | 0.4   | 0.28   | 0.38   |
|         | 17       | 0.21  | 0.15  | 0.29        | 0.13    | 0.27  | 0.22   | 0.31   |

|    |      |      |      |      |      |      |      |
|----|------|------|------|------|------|------|------|
| 18 | 0.27 | 0.23 | 0.35 | 0.13 | 0.36 | 0.24 | 0.38 |
| 19 | 0.26 | 0.26 | 0.36 | 0.13 | 0.43 | 0.29 | 0.39 |
| 20 | 0.21 | 0.36 | 0.38 | 0.13 | 0.4  | 0.27 | 0.33 |
| 21 | 0.13 | 0.19 | 0.39 | 0.15 | 0.26 | 0.3  | 0.34 |
| 22 | 0.31 | 0.24 | 0.48 | 0.19 | 0.46 | 0.32 | 0.44 |
| 23 | 0.29 | 0.28 | 0.36 | 0.17 | 0.46 | 0.33 | 0.35 |
| 24 | 0.2  | 0.23 | 0.32 | 0.1  | 0.35 | 0.24 | 0.34 |
| 25 |      |      |      |      |      |      |      |
| 26 | 0.14 | 0.21 | 0.35 | 0.11 | 0.25 | 0.26 | 0.34 |
| 27 | 0.25 | 0.22 | 0.38 | 0.16 | 0.36 | 0.28 | 0.35 |

---

Table S20.2 CpG sites methylation level of SNRPN in CHD patients and healthy individuals

| Groups  | SampleID | CpG_12 | CpG_13.14.15 | CpG_16 | CpG_17 | CpG_18 |
|---------|----------|--------|--------------|--------|--------|--------|
| Control | 1        | 0.37   | 0.47         | 0.32   | 0.19   | 0.47   |
|         | 2        | 0.34   | 0.47         | 0.55   | 0.6    | 0.6    |
|         | 3        |        |              |        |        |        |
|         | 4        | 0.35   | 0.48         | 0.36   | 0.28   | 0.53   |
|         | 5        |        |              |        |        |        |
|         | 6        | 0.34   | 0.51         | 0.45   | 0.37   | NA     |
|         | 7        | 0.36   | 0.46         | 0.34   | 0.23   | NA     |
|         | 8        | 0.41   | 0.6          | 0.45   | 0.75   | 0.35   |
|         | 9        | 0.34   | 0.54         | 0.39   | 0.43   | 0.28   |
|         | 10       | 0.39   | 0.53         | 0.35   | 0.43   | 0.53   |
|         | 11       | 0.33   | 0.54         | 0.31   | 0.41   | NA     |
|         | 12       | 0.36   | 0.47         | 0.34   | 0.19   | 0.46   |
|         | 13       | 0.34   | 0.53         | 0.37   | 0.51   | 0.53   |
|         | 14       | 0.32   | 0.44         | 0.26   | 0.29   | NA     |
|         | 15       | 0.34   | 0.49         | 0.42   | 0.48   | 0.61   |
|         | 16       | 0.39   | 0.53         | 0.35   | 0.42   | NA     |
|         | 17       | 0.39   | 0.53         | 0.32   | 0.32   | 0.51   |
|         | 18       | 0.4    | 0.51         | 0.38   | 0.47   | 0.59   |
|         | 19       | 0.35   | 0.43         | 0.28   | 0.3    | 0.51   |
|         | 20       |        |              |        |        |        |
|         | 21       | 0.36   | 0.49         | 0.39   | 0.3    | 0.39   |
|         | 22       | 0.38   | 0.53         | 0.49   | 0.34   | 0.47   |
|         | 23       | 0.37   | 0.52         | 0.33   | 0.38   | 0.29   |
|         | 24       | 0.38   | 0.5          | 0.47   | 0.41   | 0.47   |
|         | 25       | 0.42   | 0.55         | 0.4    | 0.47   | 0.62   |
|         | 26       | 0.38   | 0.52         | 0.39   | 0.35   | 0.46   |
|         | 27       |        |              |        |        |        |
| 28      | 0.39     | 0.56   | 0.38         | 0.39   | 0.44   |        |
| CHD     | 1        | 0.36   | 0.52         | 0.32   | 0.3    | 0.2    |
|         | 2        | 0.4    | 0.61         | 0.5    | 0.47   | 1      |
|         | 3        | 0.41   | 0.56         | 0.45   | 0.44   | 0.53   |
|         | 4        | 0.38   | 0.48         | 0.41   | 0.26   | 0.53   |
|         | 5        | 0.33   | 0.5          | 0.35   | 0.41   | 0.42   |
|         | 6        | 0.31   | 0.45         | 0.3    | 0.19   | 0.38   |
|         | 7        | 0.36   | 0.51         | 0.39   | 0.37   | 0.97   |
|         | 8        | 0.37   | 0.54         | 0.39   | 0.33   | 0.51   |
|         | 9        | 0.36   | 0.47         | 0.38   | 0.36   | 0.46   |
|         | 10       | 0.38   | 0.51         | 0.29   | 0.28   | 0.45   |
|         | 11       | 0.41   | 0.59         | 0.38   | 0.37   | 0.46   |
|         | 12       | 0.3    | 0.42         | 0.3    | 0.26   | 0.32   |
|         | 13       | 0.37   | 0.51         | 0.43   | 0.42   | 0.4    |
|         | 14       |        |              |        |        |        |
|         | 15       | 0.36   | 0.48         | 0.38   | 0.34   | 0.47   |
|         | 16       | 0.36   | 0.5          | 0.35   | 0.31   | 0.48   |
|         | 17       | 0.31   | 0.46         | 0.28   | 0.27   | 0.4    |

|    |      |      |      |      |      |
|----|------|------|------|------|------|
| 18 | 0.36 | 0.49 | 0.44 | 0.32 | 0.46 |
| 19 | 0.36 | 0.49 | 0.31 | 0.35 | 0.46 |
| 20 | 0.29 | 0.5  | 0.31 | 0.6  | 0.47 |
| 21 | 0.37 | 0.47 | 0.34 | 0.31 | 0.39 |
| 22 | 0.42 | 0.54 | 0.49 | 0.45 | 0.71 |
| 23 | 0.4  | 0.56 | 0.48 | 0.46 | 0.47 |
| 24 | 0.3  | 0.45 | 0.4  | 0.36 | 0.45 |
| 25 |      |      |      |      |      |
| 26 | 0.3  | 0.37 | 0.22 | 0.19 | 0.33 |
| 27 | 0.34 | 0.49 | 0.38 | 0.27 | 0.38 |

---
