# Supplementary material for: DNA methylation abnormalities of imprinted genes in congenital heart disease: a pilot study
Source: PubMed Central journal article supplement (PMC7789576; doi:10.1186/s12920-020-00848-0), 2021-01-06
Supplement: 12920_2020_848_MOESM30_ESM.pdf [file 12920_2020_848_MOESM30_ESM.pdf]

Table S21 CpG sites methylation level of ZIM2 in CHD patients and healthy individuals

| Groups  | SampleID | CpG_1.2 | CpG_3.4 | CpG_5 | CpG_6 |
|---------|----------|---------|---------|-------|-------|
|         | 1        | 0.31    | 0.4     | 0.33  | 0.42  |
|         | 2        | 0.33    | 0.24    | 0.38  | 0.32  |
|         | 3        | 0.35    | 0.32    | 0.4   | 0.4   |
|         | 4        | 0.31    | 0.22    | 0.36  | 0.35  |
|         | 5        | 0.34    | 0.38    | 0.44  | 0.01  |
|         | 6        | 0.35    | 0.27    | 0.41  | 0.4   |
|         | 7        | 0.32    | 0.35    | 0.36  | 0.38  |
|         | 8        | 0.33    | 0.38    | 0.42  | 0.47  |
|         | 9        |         |         |       |       |
|         | 10       | 0.35    | 0.29    | 0.42  | 0.44  |
|         | 11       | 0.42    | 0.36    | 0.5   | 0.45  |
|         | 12       | 0.34    | 0.36    | 0.41  | 0.45  |
|         | 13       | 0.34    | 0.3     | 0.4   | 0.43  |
| Control | 14       | 0.35    | 0.35    | 0.4   | 0.44  |
|         | 15       | 0.35    | 0.41    | 0.38  | 0.39  |
|         | 16       | 0.43    | 0.49    | 0.58  | 0.58  |
|         | 17       | 0.33    | 0.34    | 0.42  | 0.42  |
|         | 18       | 0.32    | 0.28    | 0.38  | 0.36  |
|         | 19       | 0.35    | 0.32    | 0.43  | 0.43  |
|         | 20       |         |         |       |       |
|         | 21       | 0.29    | 0.32    | 0.42  | 0.41  |
|         | 22       | 0.33    | 0.3     | 0.4   | 0.39  |
|         | 23       | 0.27    | 0.26    | 0.38  | 0.35  |
|         | 24       | 0.36    | 0.34    | 0.4   | 0.45  |
|         | 25       | 0.37    | 0.43    | 0.42  | 0.56  |
|         | 26       | 0.32    | 0.27    | 0.39  | 0.37  |
|         | 27       | 0.34    | 0.36    | 0.43  | 0.43  |
|         | 28       |         |         |       |       |
|         | 1        | 0.31    | 0.36    | 0.42  | 0.41  |
|         | 2        | 0.29    | 0.24    | 0.35  | 0.34  |
|         | 3        | 0.37    | 0.34    | 0.46  | 0.46  |
|         | 4        | 0.28    | 0.15    | 0.31  | 0.27  |
|         | 5        | 0.31    | 0.27    | 0.38  | 0.42  |
|         | 6        | 0.27    | 0.24    | 0.37  | 0.33  |
|         | 7        |         |         |       |       |
|         | 8        | 0.32    | 0.24    | 0.33  | 0.41  |
|         | 9        | 0.28    | 0.3     | 0.4   | 0.39  |
|         | 10       | 0.32    | 0.37    | 0.41  | 0.43  |
|         | 11       | 0.37    | 0.38    | 0.39  | 0.44  |
|         | 12       | 0.29    | 0.34    | 0.4   | 0.37  |
|         | 13       | 0.35    | 0.45    | 0.42  | 0.38  |
| CHD     | 14       | 0.46    | 0.41    | 0.54  | 0.02  |
|         | 15       | 0.34    | 0.37    | 0.38  | 0.55  |
|         | 16       | 0.36    | 0.34    | 0.43  | 0.44  |
|         | 17       | 0.41    | 0.46    | 0.49  | 0.55  |

|    |      |      |      |      |
|----|------|------|------|------|
| 18 | 0.34 | 0.29 | 0.43 | 0.42 |
| 19 | 0.32 | 0.3  | 0.39 | 0.41 |
| 20 | 0.4  | 0.32 | 0.44 | 0.47 |
| 21 |      |      |      |      |
| 22 | 0.38 | 0.33 | 0.43 | 0.57 |
| 23 |      |      |      |      |
| 24 | 0.34 | 0.26 | 0.4  | 0.34 |
| 25 | 0.33 | 0.33 | 0.44 | 0.47 |
| 26 | 0.46 | 0.36 | 0.5  | 0.47 |
| 27 | 0.29 | 0.26 | 0.36 | 0.35 |

---
